# Supplementary material for: Enhancing the electronic and photocatalytic properties of (SnO2)n/(TiO2)m oxide superlattices for efficient hydrogen production: a first-principles study
Source: Royal Society of Chemistry journal article supplement (doi:10.1039/d4cp03363a), 2024-11-29
Supplement: d4cp03363a1.pdf [file d4cp03363a1.pdf]

## Supplementary material

### Enhancing the electronic and photocatalytic properties of ( $SnO_2$ )<sub>n</sub>/( $TiO_2$ )<sub>m</sub> oxide superlattices for efficient hydrogen production : a first-principles study.

Najwa Harrati\*<sup>a</sup>, Bastien Casier<sup>a</sup>, and Adlane Sayede<sup>†a</sup>

<sup>1</sup>Univ. Artois, UMR 8181, Unité de Catalyse et de Chimie du Solide (UCCS), F-62300  
Lens, France

#### Supplementary Equations

##### HSE06 functional

The hybrid Heyd-Scuseria-Ernzerhof (HSE06) functional describes the electron-electron interaction in terms of long-range (LR) and short-range (SR) parts. It combines the exact Hartree-Fock exchange  $\alpha E_x^{\text{HF, SR}}(\omega)$  with the PBE short-range exchange  $E_x^{\text{PBE, SR}}$ , including the full PBE correlation  $E_c^{\text{PBE}}$ . The expression for  $E_{xc}^{\text{HSE}}$  is :

$$E_{xc}^{\text{HSE}} = \alpha E_x^{\text{HF, SR}}(\omega) + (1 - \alpha) E_x^{\text{PBE, SR}}(\omega) + (1 - \alpha) E_x^{\text{PBE, LR}}(\omega) + \alpha E_c^{\text{PBE}}(\omega) \quad (1)$$

where  $\alpha$  and  $\omega$  are the mixing and screening coefficients, respectively. we set these coefficients to  $\alpha = 0.25$  and  $\omega = 0.2 \text{ \AA}^{-1}$  to obtain the bandgaps for  $SnO_2$  and  $TiO_2$  systems close to the experimental values.

##### Photocatalytic properties

For superlattices, such equations need to be rescaled according to their stoichiometry.

For the ( $SnO_2$ )<sub>(2)</sub>/( $TiO_2$ )<sub>(2)</sub> superlattice :

$$E_{\text{VBM}}^{(SnO_2)_{(2)}/(TiO_2)_{(2)}} = \left( (\chi_{\text{Sn}}^2 \chi_{\text{Ti}}^2 \chi_{\text{O}}^8)^{\frac{1}{12}} \right) - E_0 + \frac{1}{2} E_g \quad (2)$$

$$E_{\text{CBM}}^{(SnO_2)_{(2)}/(TiO_2)_{(2)}} = E_{\text{VBM}}^{(SnO_2)_{(2)}/(TiO_2)_{(2)}} - E_g \quad (3)$$

For the ( $SnO_2$ )<sub>(3)</sub>/( $TiO_2$ )<sub>(3)</sub> superlattice :

$$E_{\text{VBM}}^{(SnO_2)_{(3)}/(TiO_2)_{(3)}} = \left( (\chi_{\text{Sn}}^3 \chi_{\text{Ti}}^3 \chi_{\text{O}}^{12})^{\frac{1}{18}} \right) - E_0 + \frac{1}{2} E_g \quad (4)$$

$$E_{\text{CBM}}^{(SnO_2)_{(3)}/(TiO_2)_{(3)}} = E_{\text{VBM}}^{(SnO_2)_{(3)}/(TiO_2)_{(3)}} - E_g \quad (5)$$

For the ( $SnO_2$ )<sub>(1)</sub>/( $TiO_2$ )<sub>(2)</sub> superlattice :

$$E_{\text{VBM}}^{(SnO_2)_{(1)}/(TiO_2)_{(2)}} = \left( (\chi_{\text{Sn}}^1 \chi_{\text{Ti}}^2 \chi_{\text{O}}^6)^{\frac{1}{9}} \right) - E_0 + \frac{1}{2} E_g \quad (6)$$

$$E_{\text{CBM}}^{(SnO_2)_{(1)}/(TiO_2)_{(2)}} = E_{\text{VBM}}^{(SnO_2)_{(1)}/(TiO_2)_{(2)}} - E_g \quad (7)$$

\*Corresponding author. Email: najwa.harrati@univ-artois.fr

†Corresponding author. Email: adlane.sayede@univ-artois.fr

For the  $(SnO_2)_{(1)}/(TiO_2)_{(3)}$  superlattice :

$$E_{\text{VBM}}^{(SnO_2)_{(1)}/(TiO_2)_{(3)}} = \left( (\chi_{\text{Sn}}^1 \chi_{\text{Ti}}^3 \chi_{\text{O}}^8)^{\frac{1}{12}} \right) - E_0 + \frac{1}{2} E_g \quad (8)$$

$$E_{\text{CBM}}^{(SnO_2)_{(1)}/(TiO_2)_{(3)}} = E_{\text{VBM}}^{(SnO_2)_{(1)}/(TiO_2)_{(3)}} - E_g \quad (9)$$

For the  $(SnO_2)_{(2)}/(TiO_2)_{(1)}$  superlattice :

$$E_{\text{VBM}}^{(SnO_2)_{(2)}/(TiO_2)_{(1)}} = \left( (\chi_{\text{Sn}}^2 \chi_{\text{Ti}}^1 \chi_{\text{O}}^6)^{\frac{1}{9}} \right) - E_0 + \frac{1}{2} E_g \quad (10)$$

$$E_{\text{CBM}}^{(SnO_2)_{(2)}/(TiO_2)_{(1)}} = E_{\text{VBM}}^{(SnO_2)_{(2)}/(TiO_2)_{(1)}} - E_g \quad (11)$$

## Supplementary Tables

Table S1: Calculated lattice parameters for the tetragonal phases of SnO<sub>2</sub> and TiO<sub>2</sub> in this work, compared with the experimental data.

| Lattice parameters (Å)  |                  | a     | c     |
|-------------------------|------------------|-------|-------|
| <i>SnO</i> <sub>2</sub> | This work        | 4.737 | 3.211 |
|                         | Experimental [1] | 4.737 | 3.187 |
| <i>TiO</i> <sub>2</sub> | This work        | 4.591 | 2.951 |
|                         | Experimental [2] | 4.593 | 2.958 |

Table S2: Average bond lengths d(Sn-O) (Å) under compressive and tensile strains of nSO/mTO superlattices.

|     | 1SO/1TO | 2SO/2TO | 3SO/3TO | 1SO/2TO | 1SO/3TO | 2SO/1TO | 3SO/1TO |
|-----|---------|---------|---------|---------|---------|---------|---------|
| -5% | 2.11042 | 2.17630 | 2.19501 | 2.12215 | 2.12803 | 2.16830 | 2.11062 |
| -4% | 2.11024 | 2.15318 | 2.15300 | 2.11417 | 2.12329 | 2.14615 | 2.10692 |
| -3% | 2.11000 | 2.13563 | 2.13468 | 2.11125 | 2.11409 | 2.13063 | 2.10332 |
| -2% | 2.10151 | 2.11970 | 2.11885 | 2.09610 | 2.09574 | 2.11606 | 2.10022 |
| -1% | 2.08769 | 2.10572 | 2.10527 | 2.08114 | 2.07873 | 2.10297 | 2.09737 |
| 0%  | 2.07293 | 2.09264 | 2.09217 | 2.06552 | 2.06209 | 2.08958 | 2.09474 |
| 1%  | 2.05899 | 2.08121 | 2.08049 | 2.05094 | 2.04794 | 2.07856 | 2.09284 |
| 2%  | 2.04511 | 2.06991 | 2.06916 | 2.03629 | 2.03133 | 2.06750 | 2.09162 |
| 3%  | 2.03302 | 2.06108 | 2.06020 | 2.02337 | 2.01540 | 2.05905 | 2.09108 |
| 4%  | 2.02117 | 2.05343 | 2.05172 | 2.01940 | 2.00585 | 2.05047 | 2.09077 |
| 5%  | 2.00855 | 2.04703 | 2.04409 | 1.99492 | 2.00428 | 2.04515 | 2.09000 |

Table S3: Average bond lengths d(Ti-O) (Å) under compressive and tensile strains of nSO/mTO superlattices.

|     | 1SO/1TO | 2SO/2TO | 3SO/3TO | 1SO/2TO | 1SO/3TO | 2SO/1TO | 3SO/1TO |
|-----|---------|---------|---------|---------|---------|---------|---------|
| -5% | 2.16233 | 2.04482 | 2.07104 | 2.10161 | 2.09922 | 2.13906 | 2.00921 |
| -4% | 2.08691 | 2.02875 | 2.02625 | 2.04987 | 2.04652 | 2.06495 | 2.00614 |
| -3% | 2.05776 | 2.01533 | 2.01082 | 2.02770 | 2.02208 | 2.04320 | 2.00363 |
| -2% | 2.03899 | 2.00239 | 1.99845 | 2.01249 | 2.00484 | 2.02659 | 2.00043 |
| -1% | 2.02436 | 1.99048 | 1.98778 | 2.00057 | 1.99141 | 2.01257 | 1.99843 |
| 0%  | 2.01020 | 1.97906 | 1.97761 | 1.98887 | 1.98038 | 1.99848 | 1.99670 |
| 1%  | 1.99815 | 1.96870 | 1.96900 | 1.97933 | 1.97330 | 1.98695 | 1.97488 |
| 2%  | 1.98653 | 1.95847 | 1.96087 | 1.97224 | 1.96781 | 1.97528 | 1.96436 |
| 3%  | 1.97820 | 1.95040 | 1.95571 | 1.96942 | 1.96490 | 1.96743 | 1.95404 |
| 4%  | 1.97192 | 1.94357 | 1.95259 | 1.96941 | 1.94624 | 1.96044 | 1.94444 |
| 5%  | 1.97060 | 1.93794 | 1.95202 | 1.95330 | 1.93649 | 1.95286 | 1.93488 |

Table S4: The calculated optimal strain and energy of nSO/mTO superlattices in response to biaxial tensile and compressive strains.

| Superlattices | Strain opt.(%) | Energy opt. (eV) |
|---------------|----------------|------------------|
| 1SO/1TO       | 0.35           | -90.5182         |
| 2SO/2TO       | 0.40           | -181.4230        |
| 3SO/3TO       | 0.41           | -272.3470        |
| 1SO/2TO       | 0.25           | -144.2511        |
| 1SO/3TO       | 0.20           | -197.9337        |
| 2SO/1TO       | 0.58           | -127.7512        |
| 3SO/1TO       | 2.57           | -165.1628        |

Table S5: The calculated elastic constants  $C_{ij}$  (in GPa) of unstrained nSO/mTO superlattices.

| $\varepsilon = 0\%$ | $C_{11}$ | $C_{33}$ | $C_{44}$ | $C_{66}$ | $C_{12}$ | $C_{13}$ |
|---------------------|----------|----------|----------|----------|----------|----------|
| 1SO/1TO             | 254.608  | 365.642  | 110.598  | 192.575  | 142.330  | 125.041  |
| 2SO/2TO             | 264.250  | 385.436  | 103.106  | 198.899  | 151.257  | 133.075  |
| 3SO/3TO             | 259.135  | 384.173  | 96.976   | 198.865  | 146.727  | 126.153  |
| 1SO/2TO             | 272.277  | 413.527  | 112.847  | 198.058  | 154.466  | 138.412  |
| 1SO/3TO             | 279.915  | 427.779  | 84.391   | 199.936  | 159.623  | 140.802  |
| 2SO/1TO             | 246.701  | 339.427  | 103.649  | 188.416  | 138.674  | 116.879  |
| 3SO/1TO             | 239.334  | 332.293  | 99.367   | 187.272  | 134.221  | 113.702  |

Table S6: The calculated Bulk Modulus (B), Shear Modulus (G),  $\frac{B}{G}$  ratio, Young's modulus (E), Poisson's ratio ( $\nu$ ) and Debye temperature ( $\theta_D$ ) of unstrained nSO/mTO superlattices.

| $\varepsilon = 0\%$ | B (GPa) | G (GPa) | $\frac{B}{G}$ | E (GPa) | $\nu$ | $\theta_D$ (K) |
|---------------------|---------|---------|---------------|---------|-------|----------------|
| 1SO/1TO             | 183.145 | 107.492 | 1.70          | 269.709 | 0.255 | 644.6          |
| 2SO/2TO             | 192.485 | 106.167 | 1.81          | 269.038 | 0.267 | 641.1          |
| 3SO/3TO             | 186.721 | 102.765 | 1.82          | 260.504 | 0.267 | 630.7          |
| 1SO/2TO             | 199.844 | 110.308 | 1.81          | 279.500 | 0.267 | 687.6          |
| 1SO/3TO             | 205.007 | 104.101 | 1.97          | 267.094 | 0.283 | 687.8          |
| 2SO/1TO             | 174.433 | 103.072 | 1.69          | 258.333 | 0.253 | 602.7          |
| 3SO/1TO             | 169.480 | 101.235 | 1.67          | 253.276 | 0.251 | 584.6          |

Table S7: CBMs and VBMs (eV) of nSO/mTO superlattices with (n=m) stacking periodicity under biaxial strains effect.

| Strain (%) | 1SO/1TO   |           | 2SO/2TO   |           | 3SO/3TO   |           |
|------------|-----------|-----------|-----------|-----------|-----------|-----------|
|            | CBMs (eV) | VBMs (eV) | CBMs (eV) | VBMs (eV) | CBMs (eV) | VBMs (eV) |
| -3         | 7.966     | 4.632     | 8.019     | 4.750     | 7.914     | 4.748     |
| -2         | 7.866     | 4.457     | 7.931     | 4.555     | 7.801     | 4.550     |
| -1         | 7.755     | 4.303     | 7.830     | 4.392     | 7.659     | 4.376     |
| 0          | 7.611     | 4.155     | 7.661     | 4.228     | 7.455     | 4.202     |
| 1          | 7.456     | 4.027     | 7.412     | 4.087     | 7.213     | 4.049     |
| 2          | 7.272     | 3.898     | 7.121     | 3.949     | 6.919     | 3.902     |
| 3          | 7.097     | 3.785     | 6.848     | 3.829     | 6.626     | 3.781     |
| 4          | 6.669     | 3.513     | 6.211     | 3.558     | 5.929     | 3.569     |

Table S8: CBMs and VBMs of nSO/mTO superlattices with (1, m) stacking periodicity under biaxial strains effect.

| Strain<br>(%) | 1SO/2TO      |              | 1SO/3TO      |              |
|---------------|--------------|--------------|--------------|--------------|
|               | CBMs<br>(eV) | VBMs<br>(eV) | CBMs<br>(eV) | VBMs<br>(eV) |
| -3            | 7.769        | 4.497        | 7.594        | 4.402        |
| -2            | 7.684        | 4.310        | 7.498        | 4.231        |
| -1            | 7.638        | 4.171        | 7.399        | 4.079        |
| 0             | 7.432        | 3.983        | 7.257        | 3.922        |
| 1             | 7.203        | 3.841        | 7.004        | 3.782        |
| 2             | 6.911        | 3.694        | 6.688        | 3.678        |
| 3             | 6.644        | 3.567        | 6.404        | 3.607        |
| 4             | 6.105        | 3.344        | 5.851        | 3.314        |

Table S9: CBMs and VBMs of nSO/mTO superlattices with (n,1) stacking periodicity under biaxial strains effect .

| Strain<br>(%) | 2SO/1TO      |              | 3SO/1TO      |              |
|---------------|--------------|--------------|--------------|--------------|
|               | CBMs<br>(eV) | VBMs<br>(eV) | CBMs<br>(eV) | VBMs<br>(eV) |
| -5            |              |              | 8.909        | 5.130        |
| -4            |              |              | 8.649        | 5.010        |
| -3            | 8.286        | 4.873        | 8.403        | 4.886        |
| -2            | 8.203        | 4.688        | 8.159        | 4.759        |
| -1            | 8.096        | 4.530        | 7.932        | 4.629        |
| 0             | 7.912        | 4.380        | 7.690        | 4.482        |
| 1             | 7.663        | 4.245        | 7.462        | 4.336        |
| 2             | 7.376        | 4.109        | 7.216        | 4.172        |
| 3             | 7.101        | 3.992        | 6.999        | 4.023        |
| 4             | 5.693        | 3.359        | 6.774        | 3.862        |
| 5             |              |              | 6.540        | 3.692        |

## Supplementary Figures

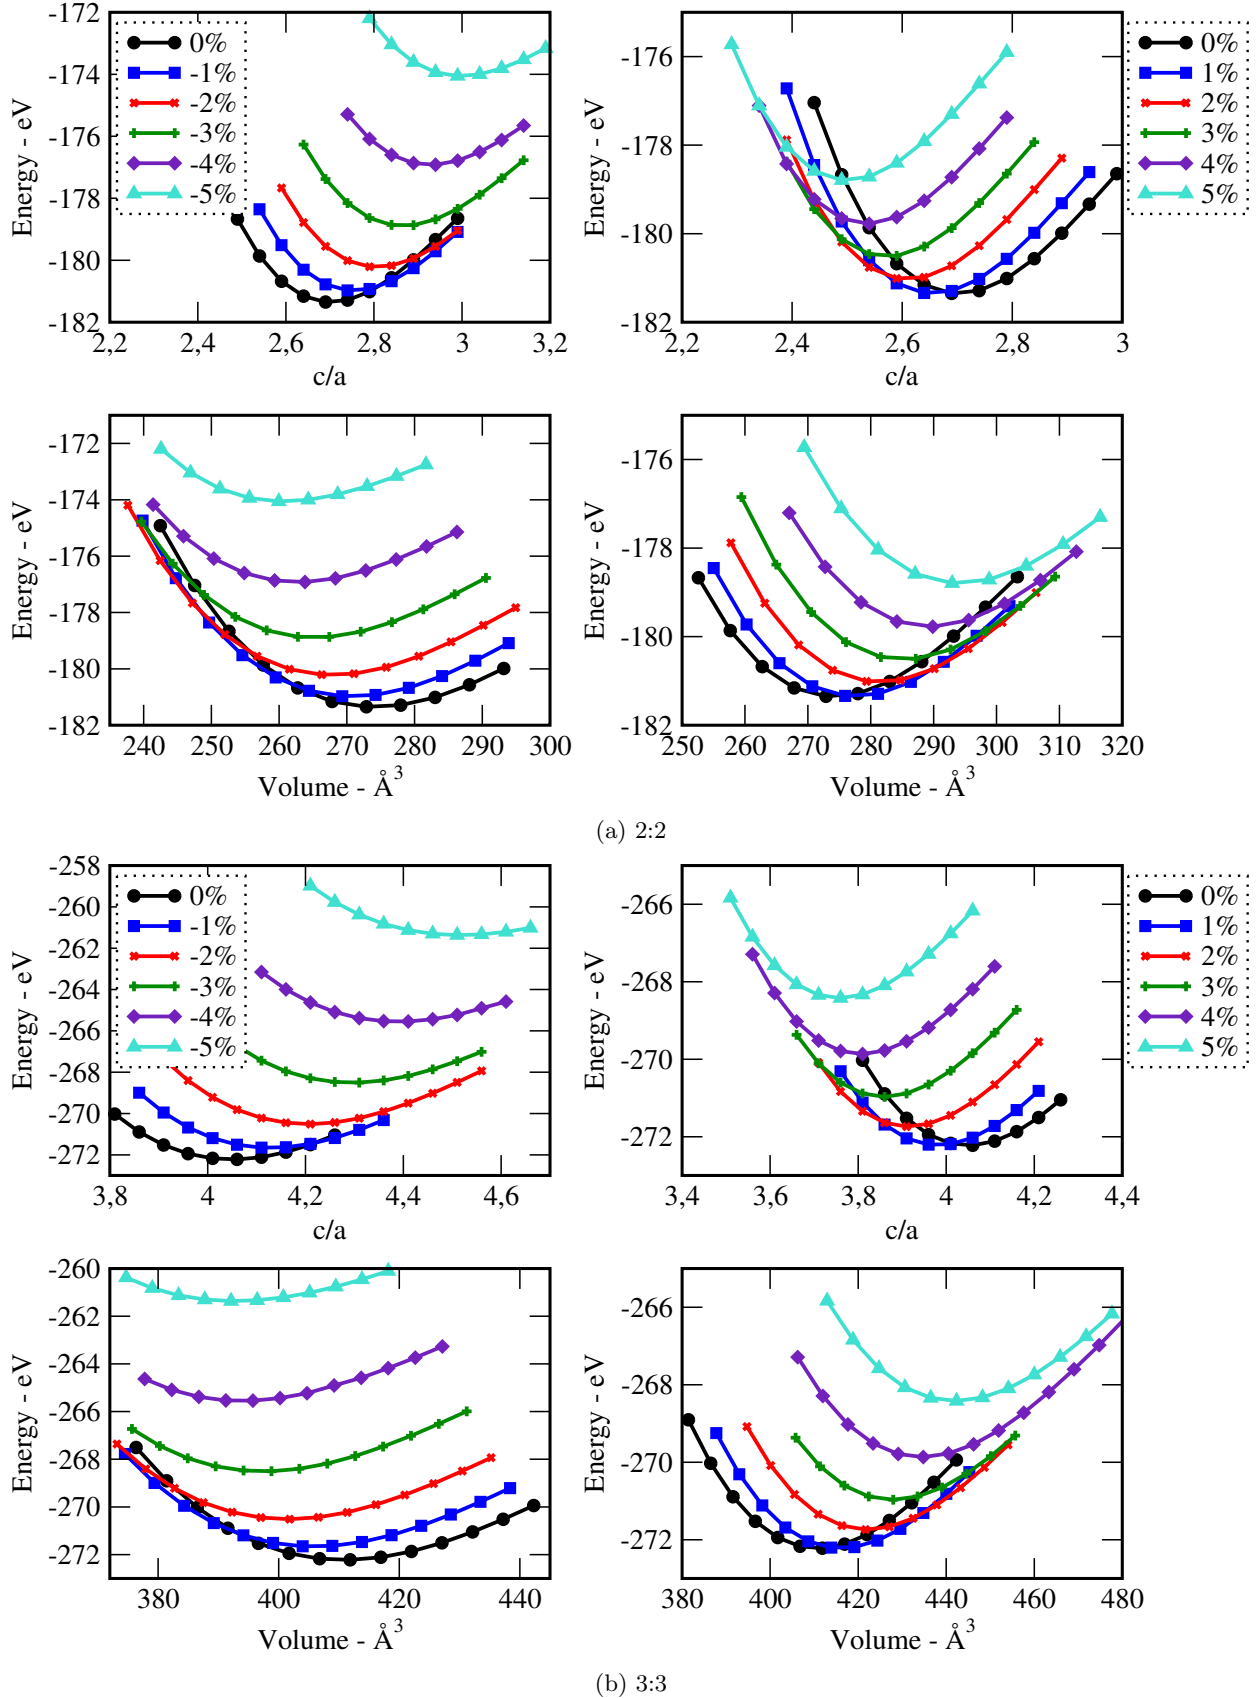

Figure S1: Structure stability of (a) 2SO/2TO and (b) 3SO/3TO superlattices under compressive (left) and tensile (right) strains.

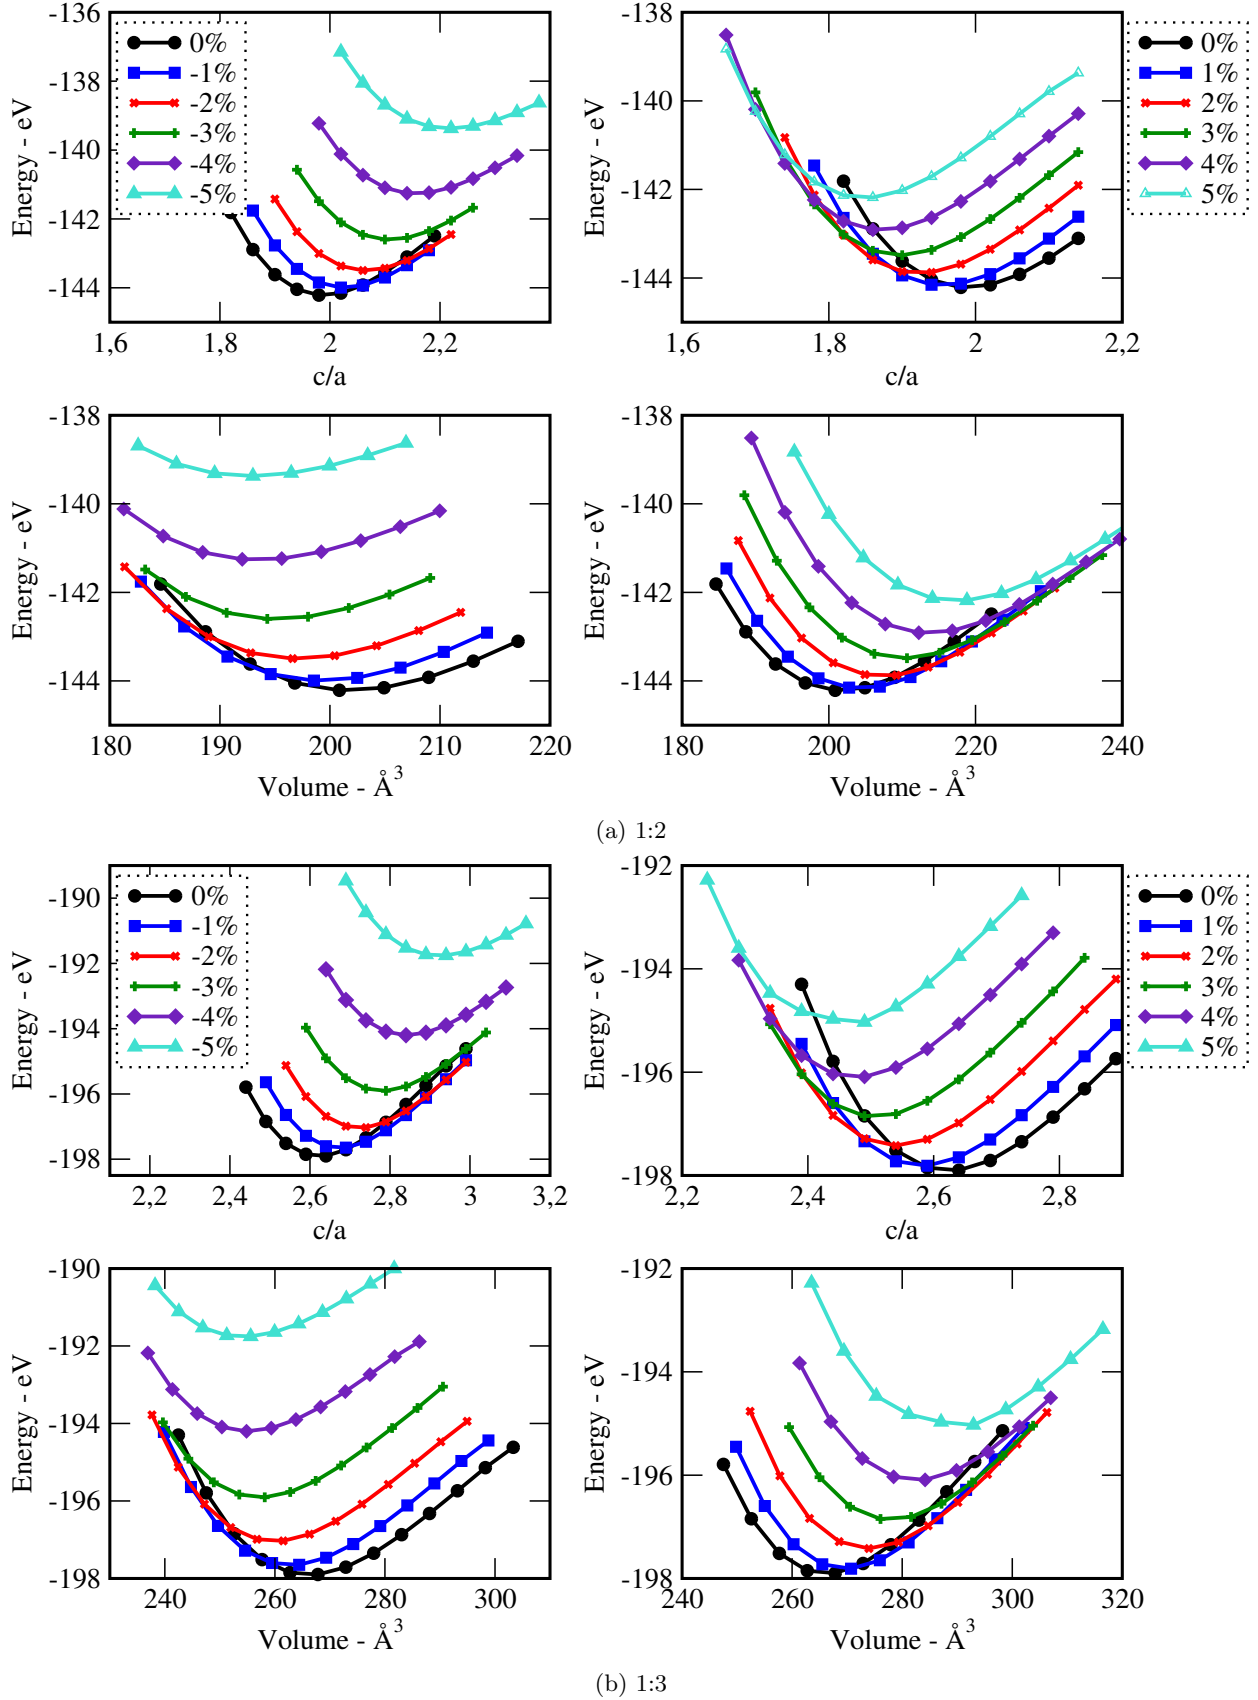

Figure S2: Structure stability of (a) 1SO/2TO and (b) 1SO/3TO superlattices under compressive (left) and tensile (right) strains.



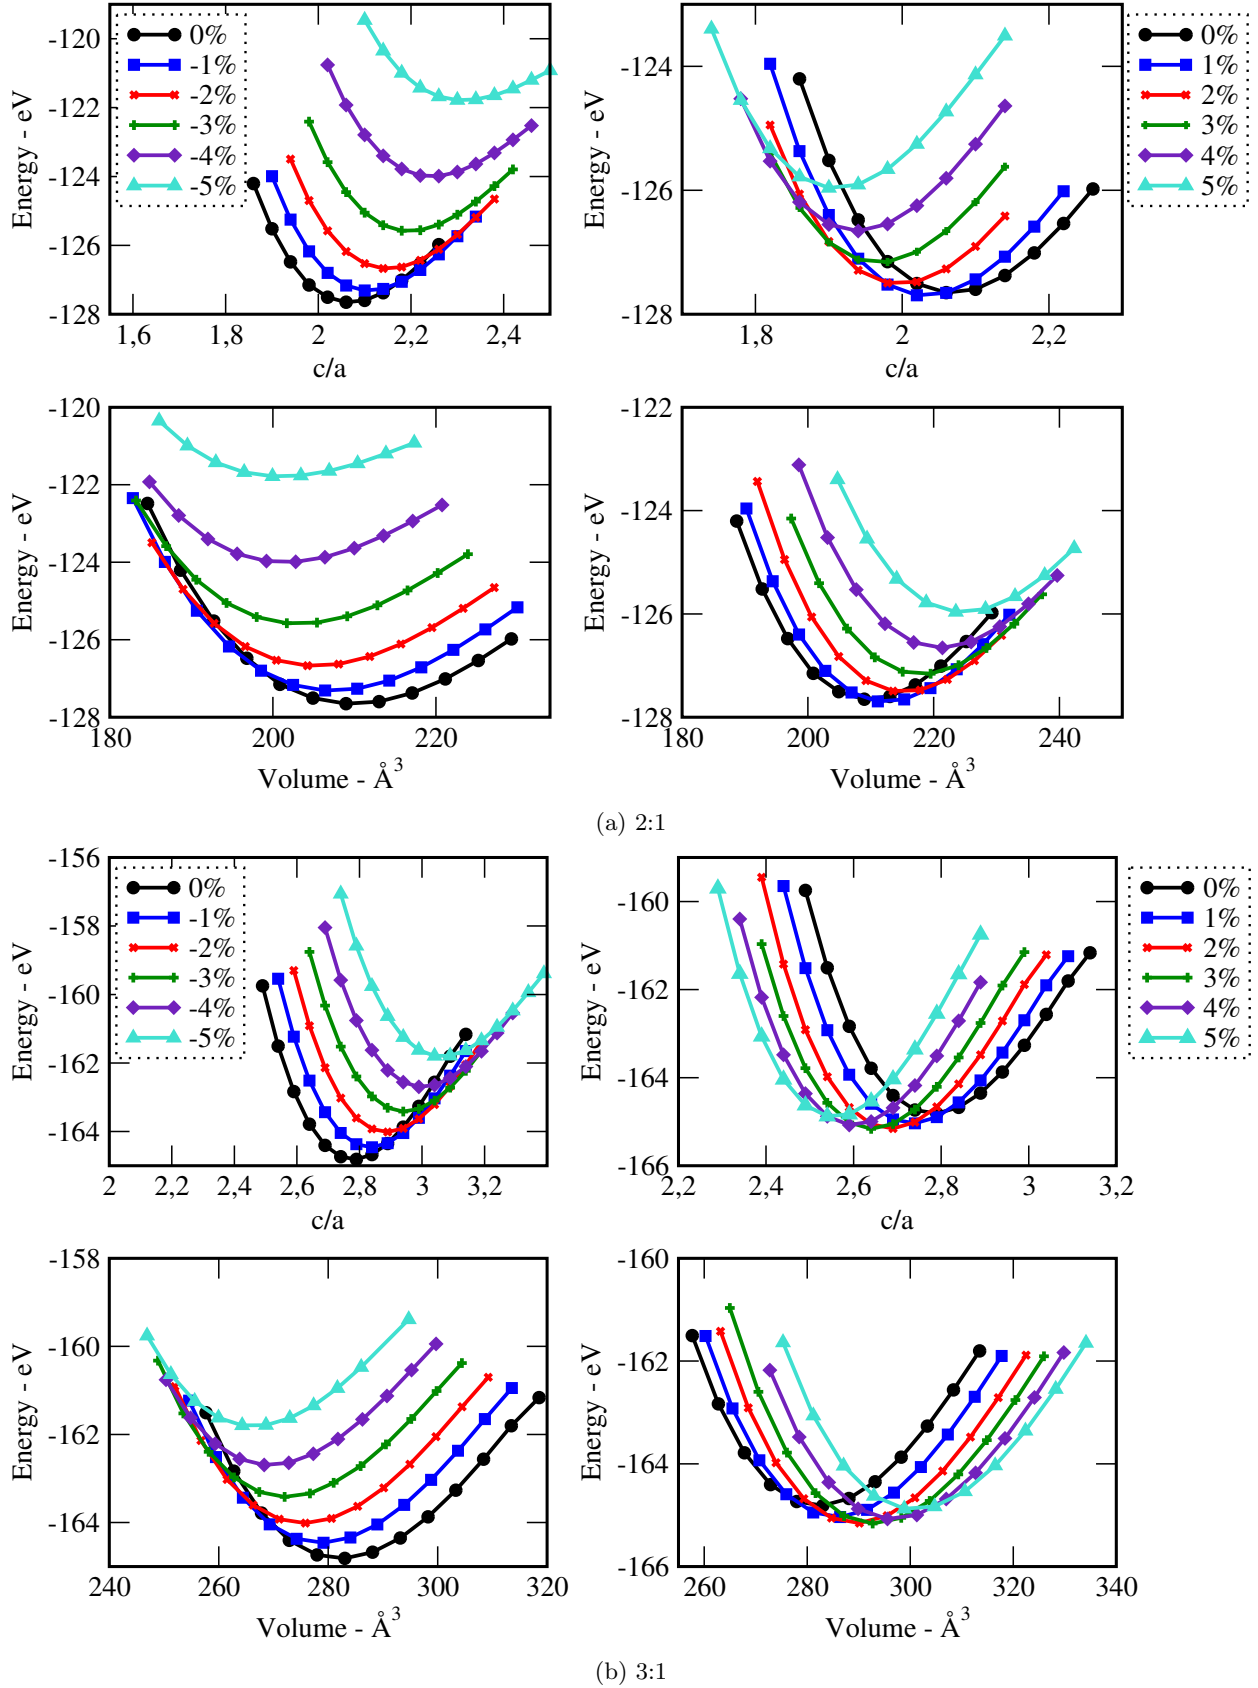

Figure S3: Structure stability of (a) 2SO/1TO and (b) 3SO/1TO superlattices under compressive (left) and tensile (right) strains..

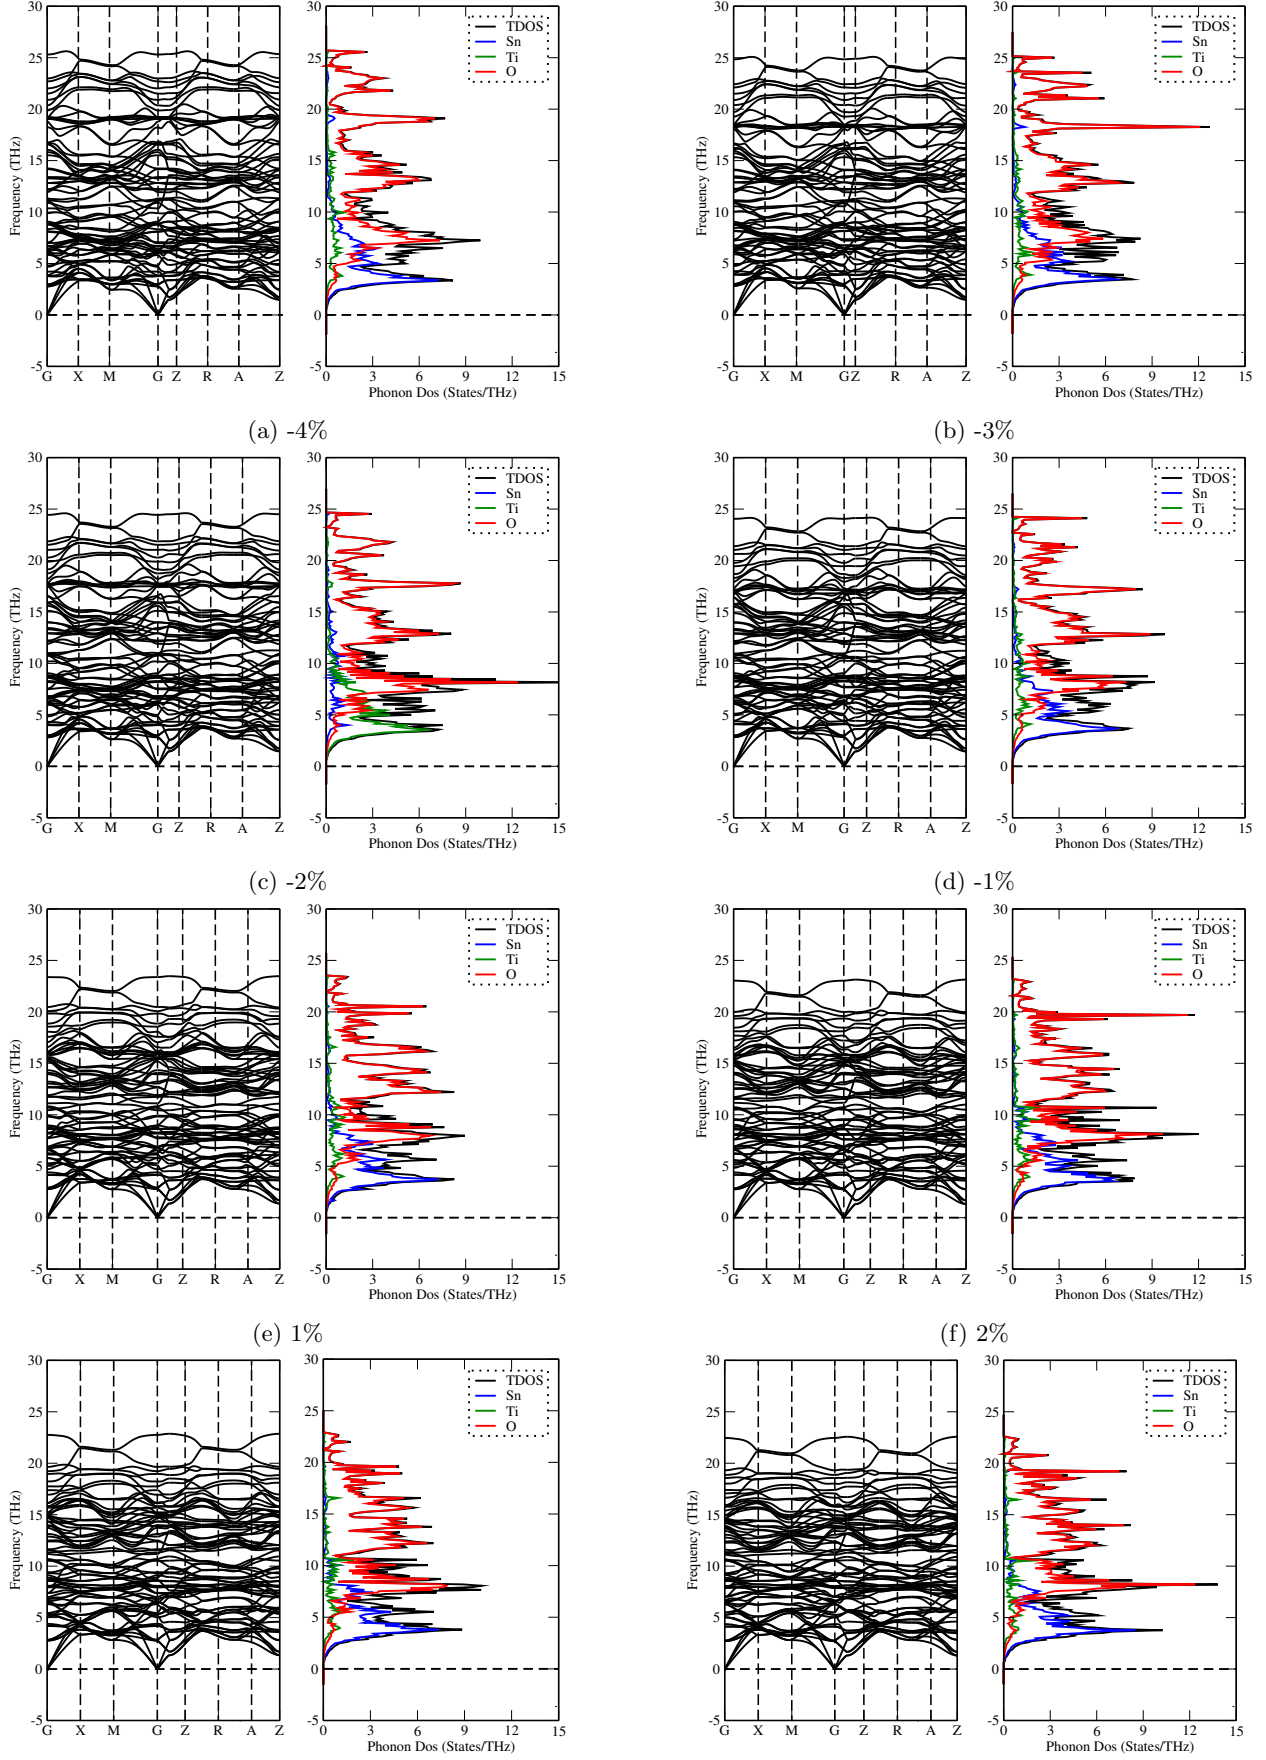

Figure S4: (a-h) Phonon dispersion curves and phonon densities of states of strained 3SO/1TO superlattice under different biaxial compressive (-4%, -3%, -2%, and -1%) and tensile (1%, 2%, 3%, and 4%) strains.

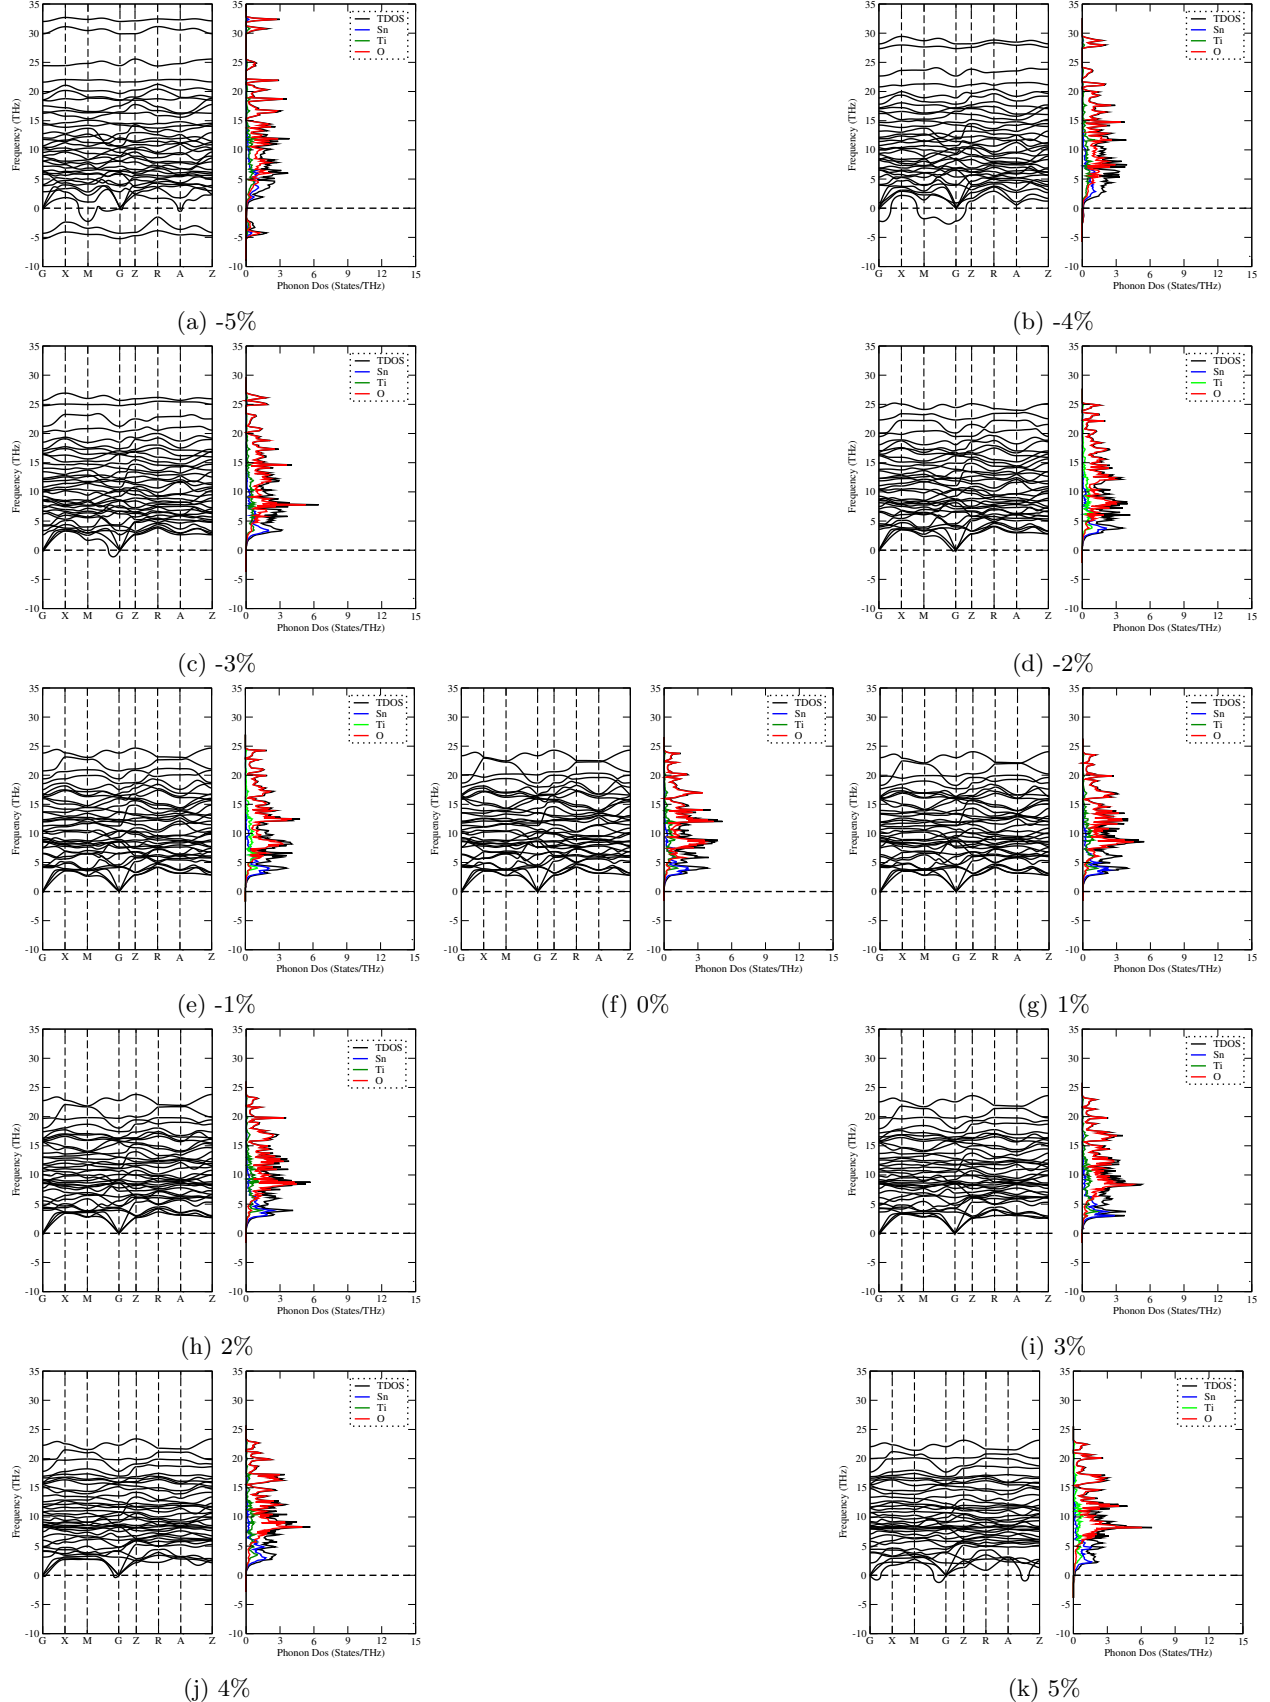

Figure S5: (a-k) Phonon dispersion curves and phonon densities of states of unstrained and strained 1SO/1TO superlattice under different biaxial compressive (-5%, -4%, -3%, -2%, and -1%) and tensile (1%, 2%, 3%, 4%, and 5%) strains.

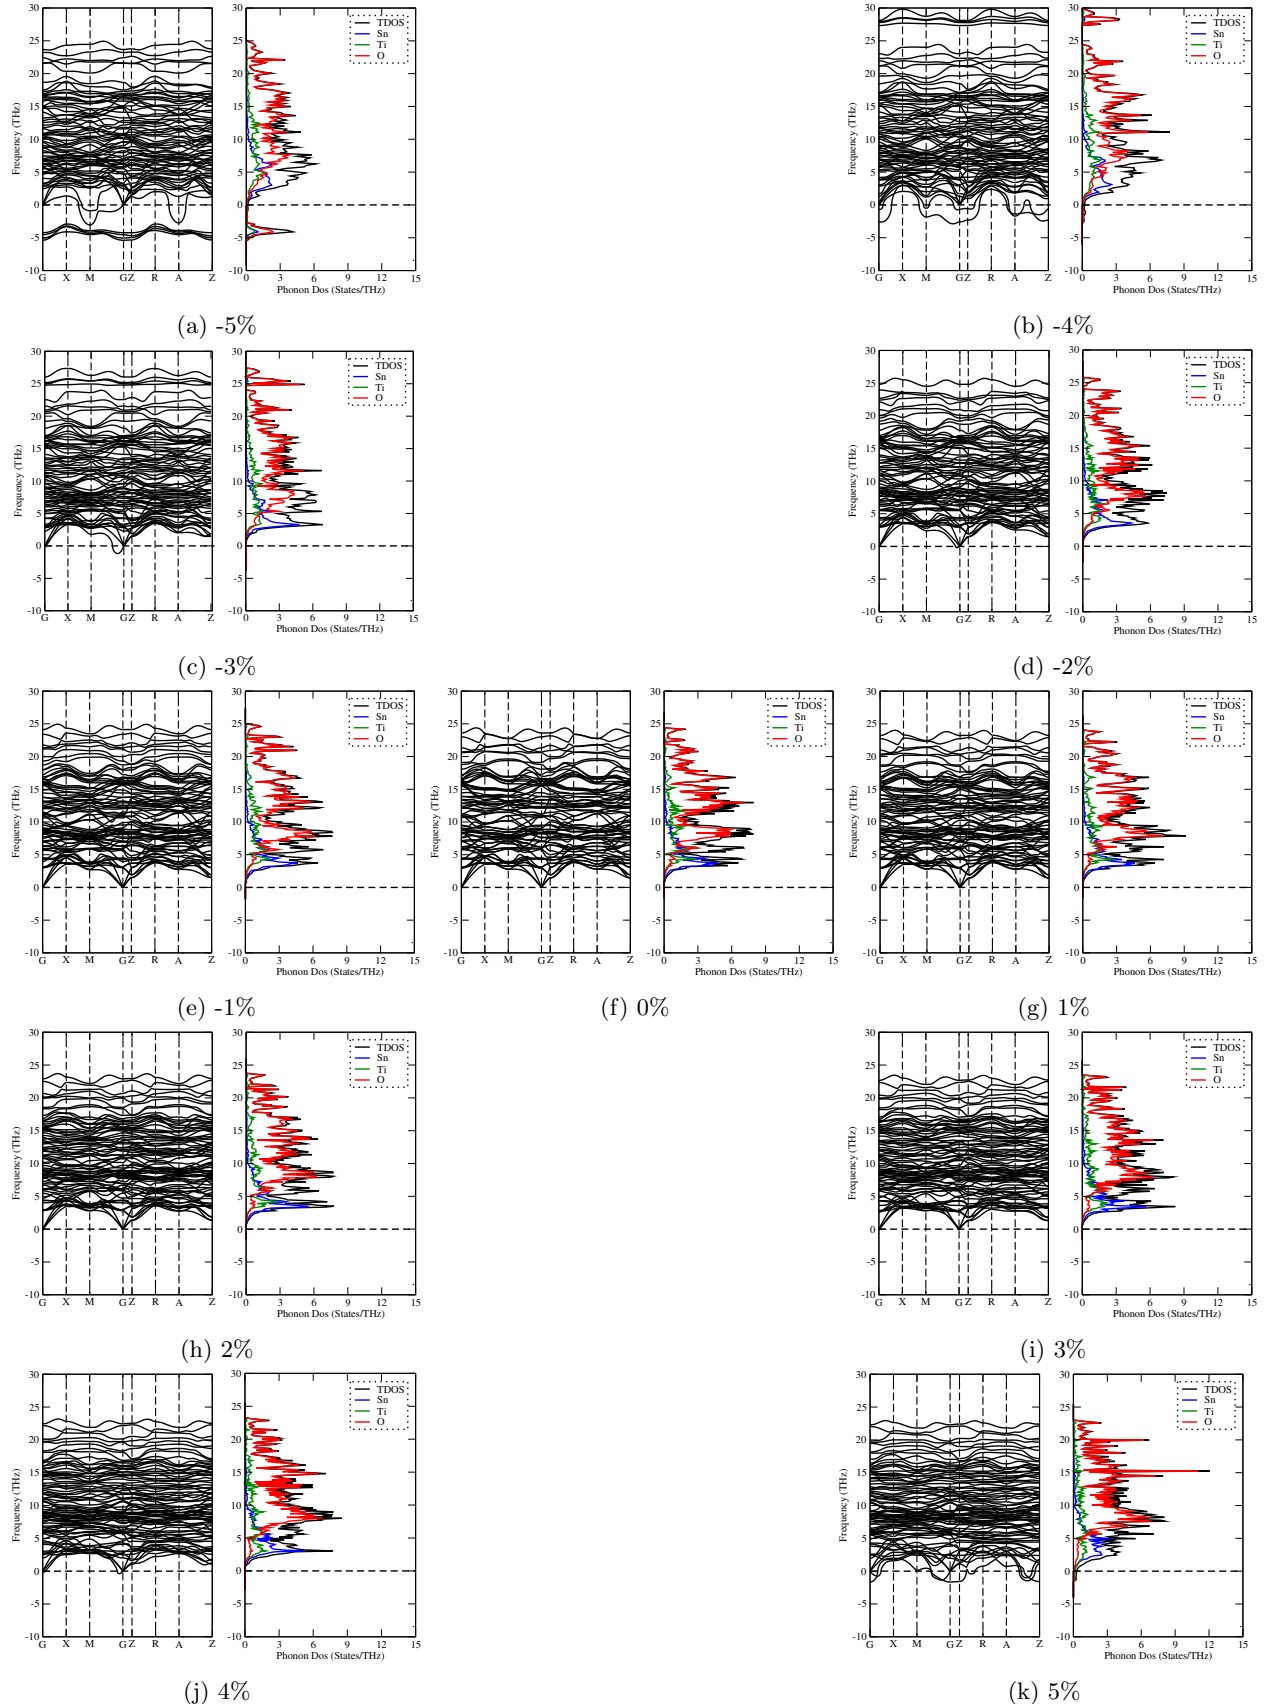

Figure S6: (a-k) Phonon dispersion curves and phonon densities of states of unstrained and strained 2SO/2TO superlattice under different biaxial/compressive (-5%, -4%, -3%, -2%, and -1%) and tensile (1%, 2%, 3%, 4%, and 5%) strains.

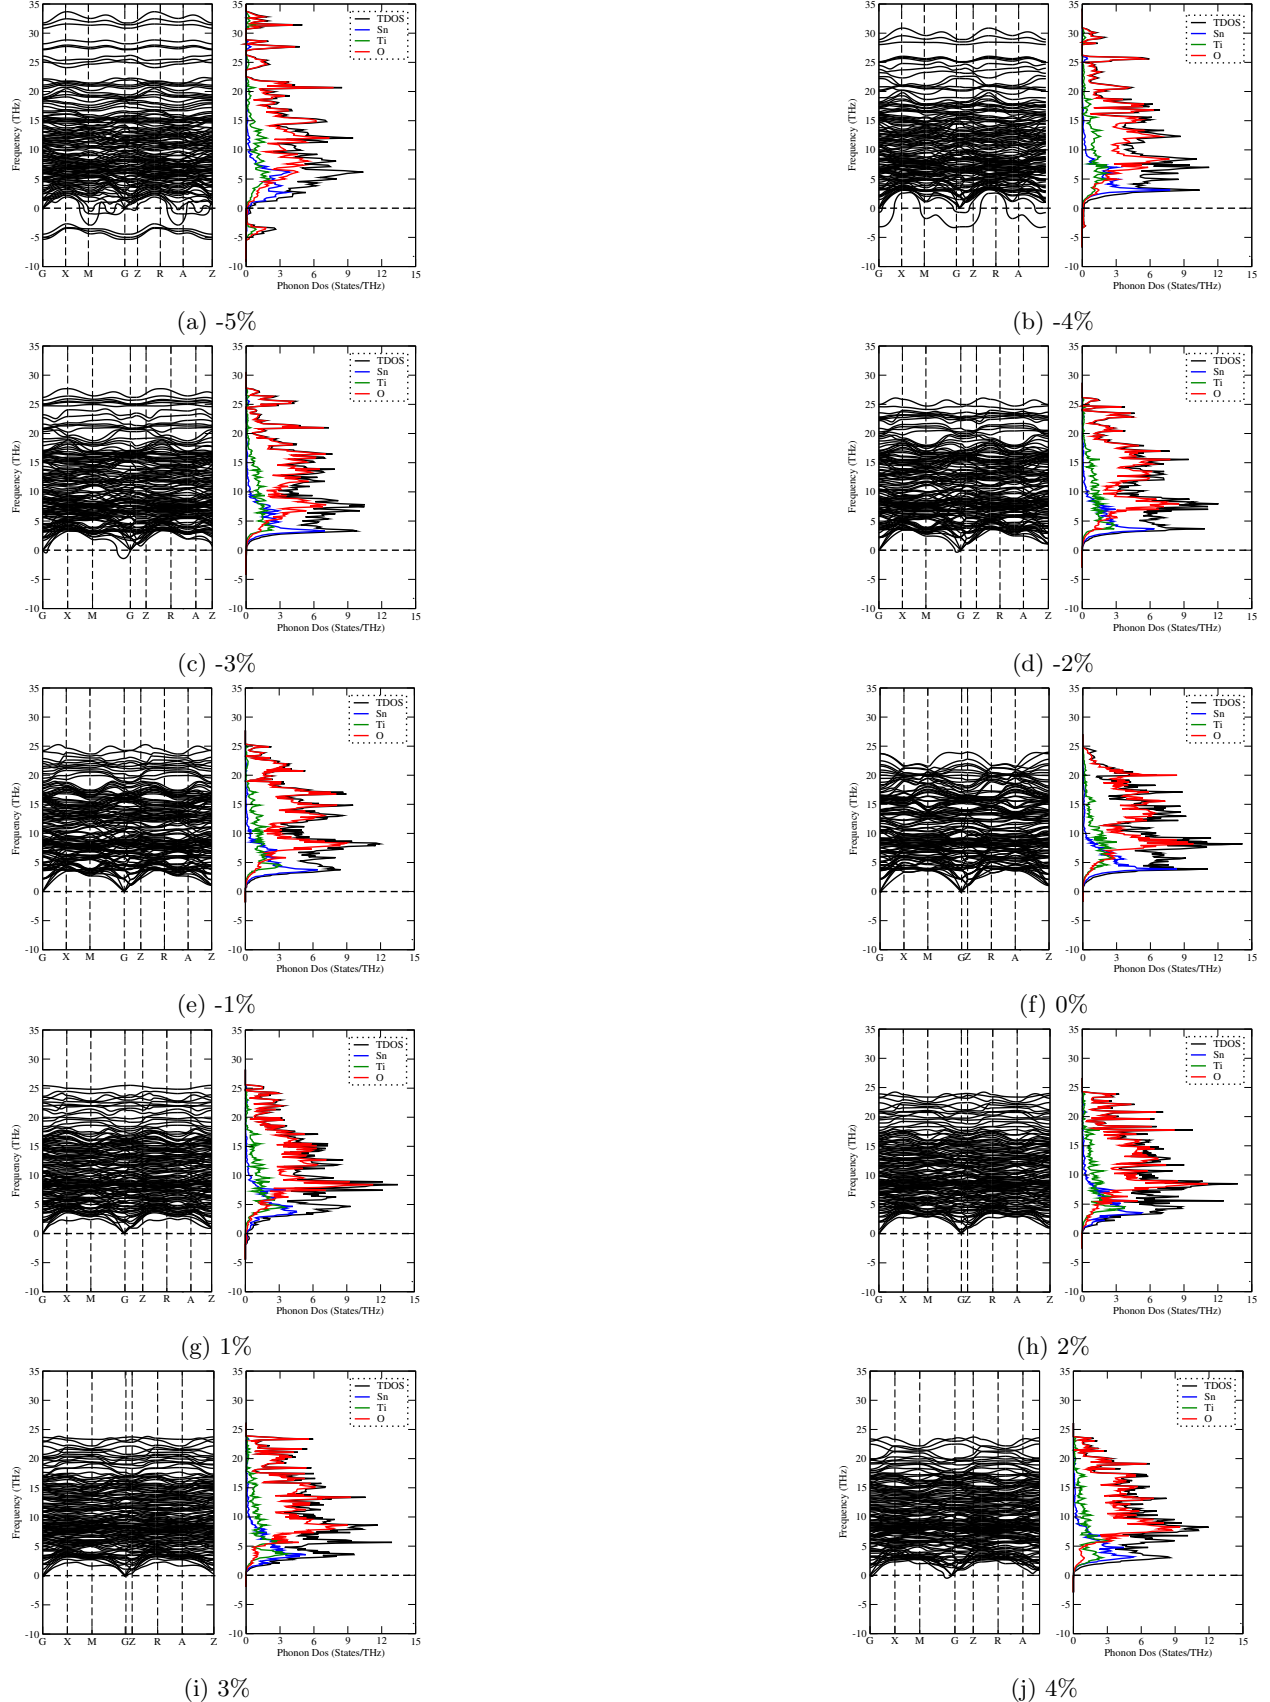

Figure S7: (a-k) Phonon dispersion curves and phonon densities of states of unstrained and strained 3SO/3TO superlattice under different biaxial compressive (-5%, -4%, -3%, -2%, and -1%) and tensile (1%, 2%, 3%, 4%, and 5%) strains.

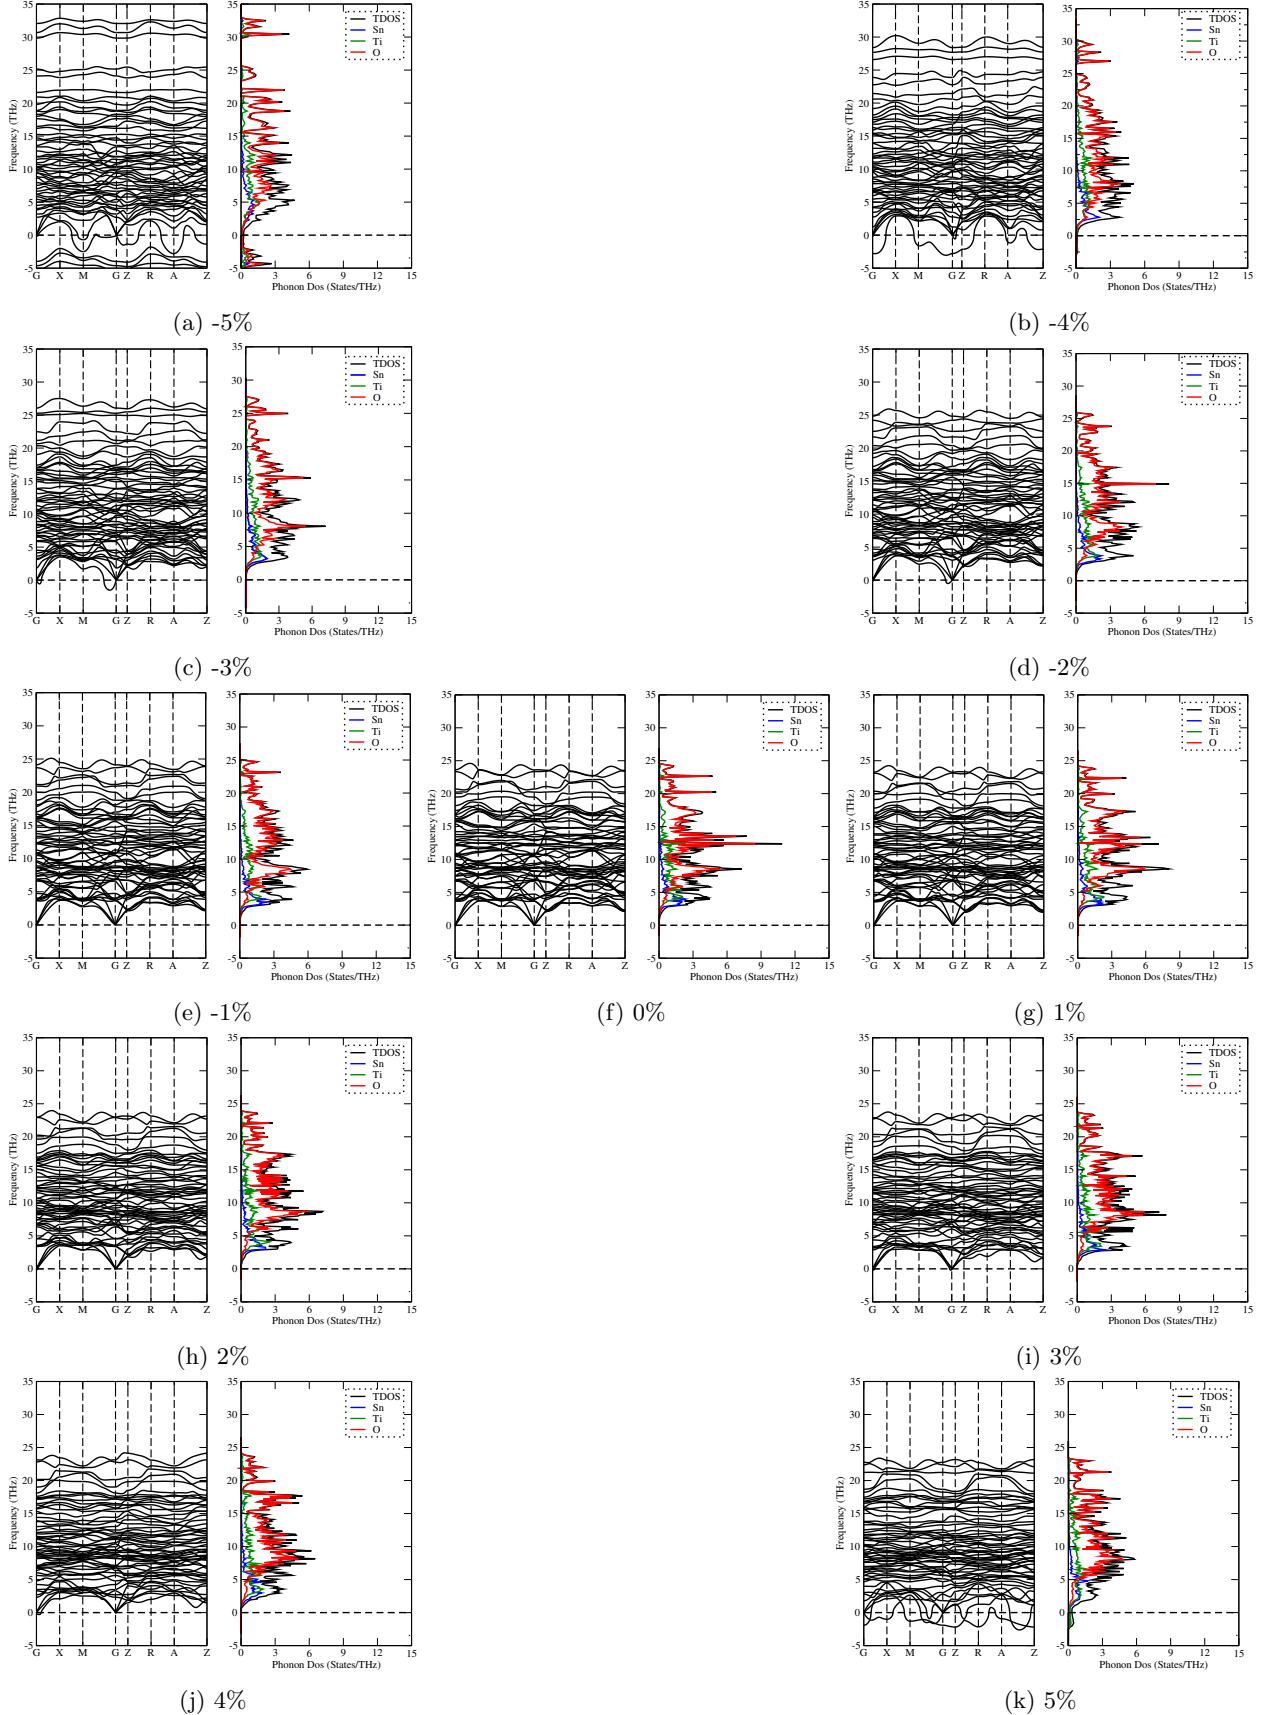

Figure 8: (a-k) Phonon dispersion curves and phonon densities of states of unstrained and strained 1SO/2TO superlattice under different biaxial compressive (-5%, -4%, -3%, -2%, and -1%) and tensile (1%, 2%, 3%, 4%, and 5%) strains.

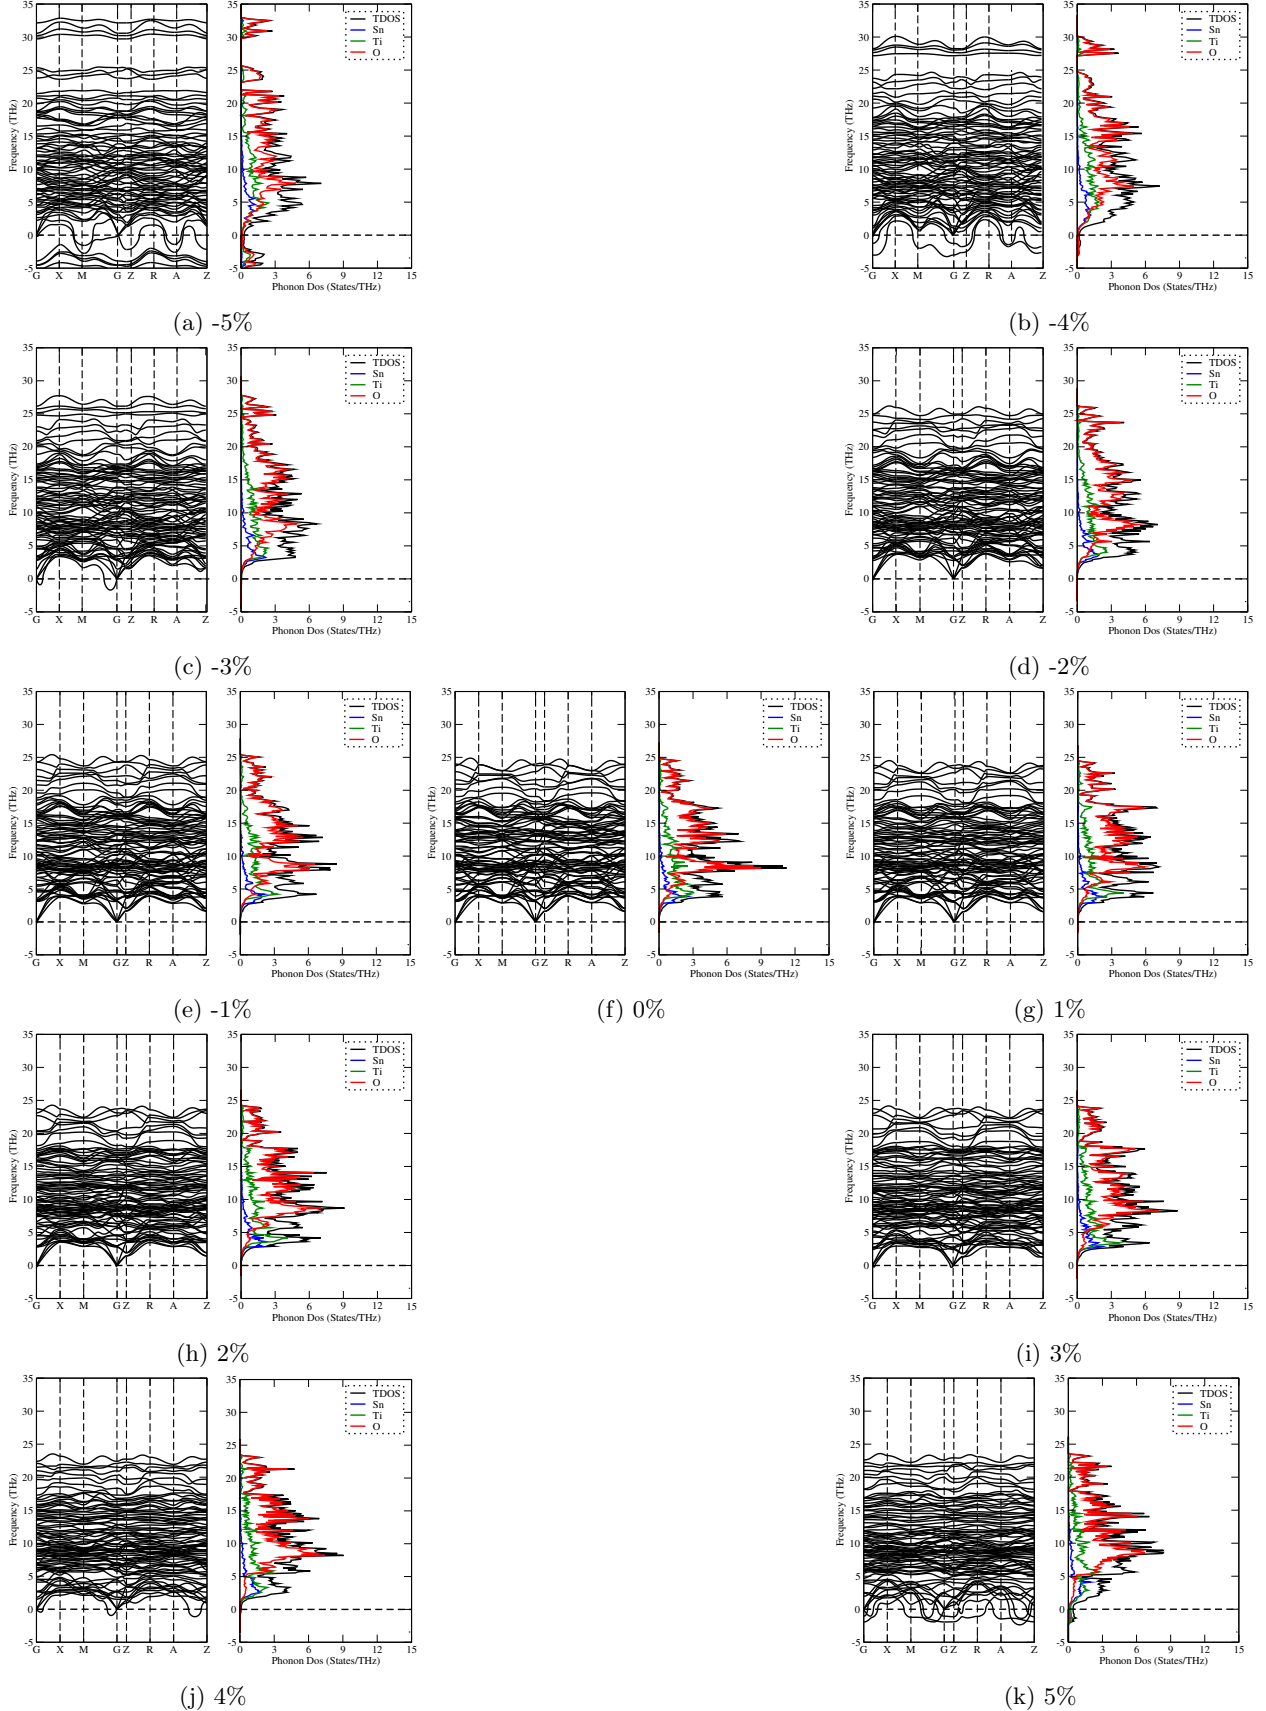

Figure S9: (a-k) Phonon dispersion curves and phonon densities of states of unstrained and strained 1SO/3TO superlattice under different biaxial compressive (-5%, -4%, -3%, -2%, and -1%) and tensile (1%, 2%, 3%, 4%, and 5%) strains.

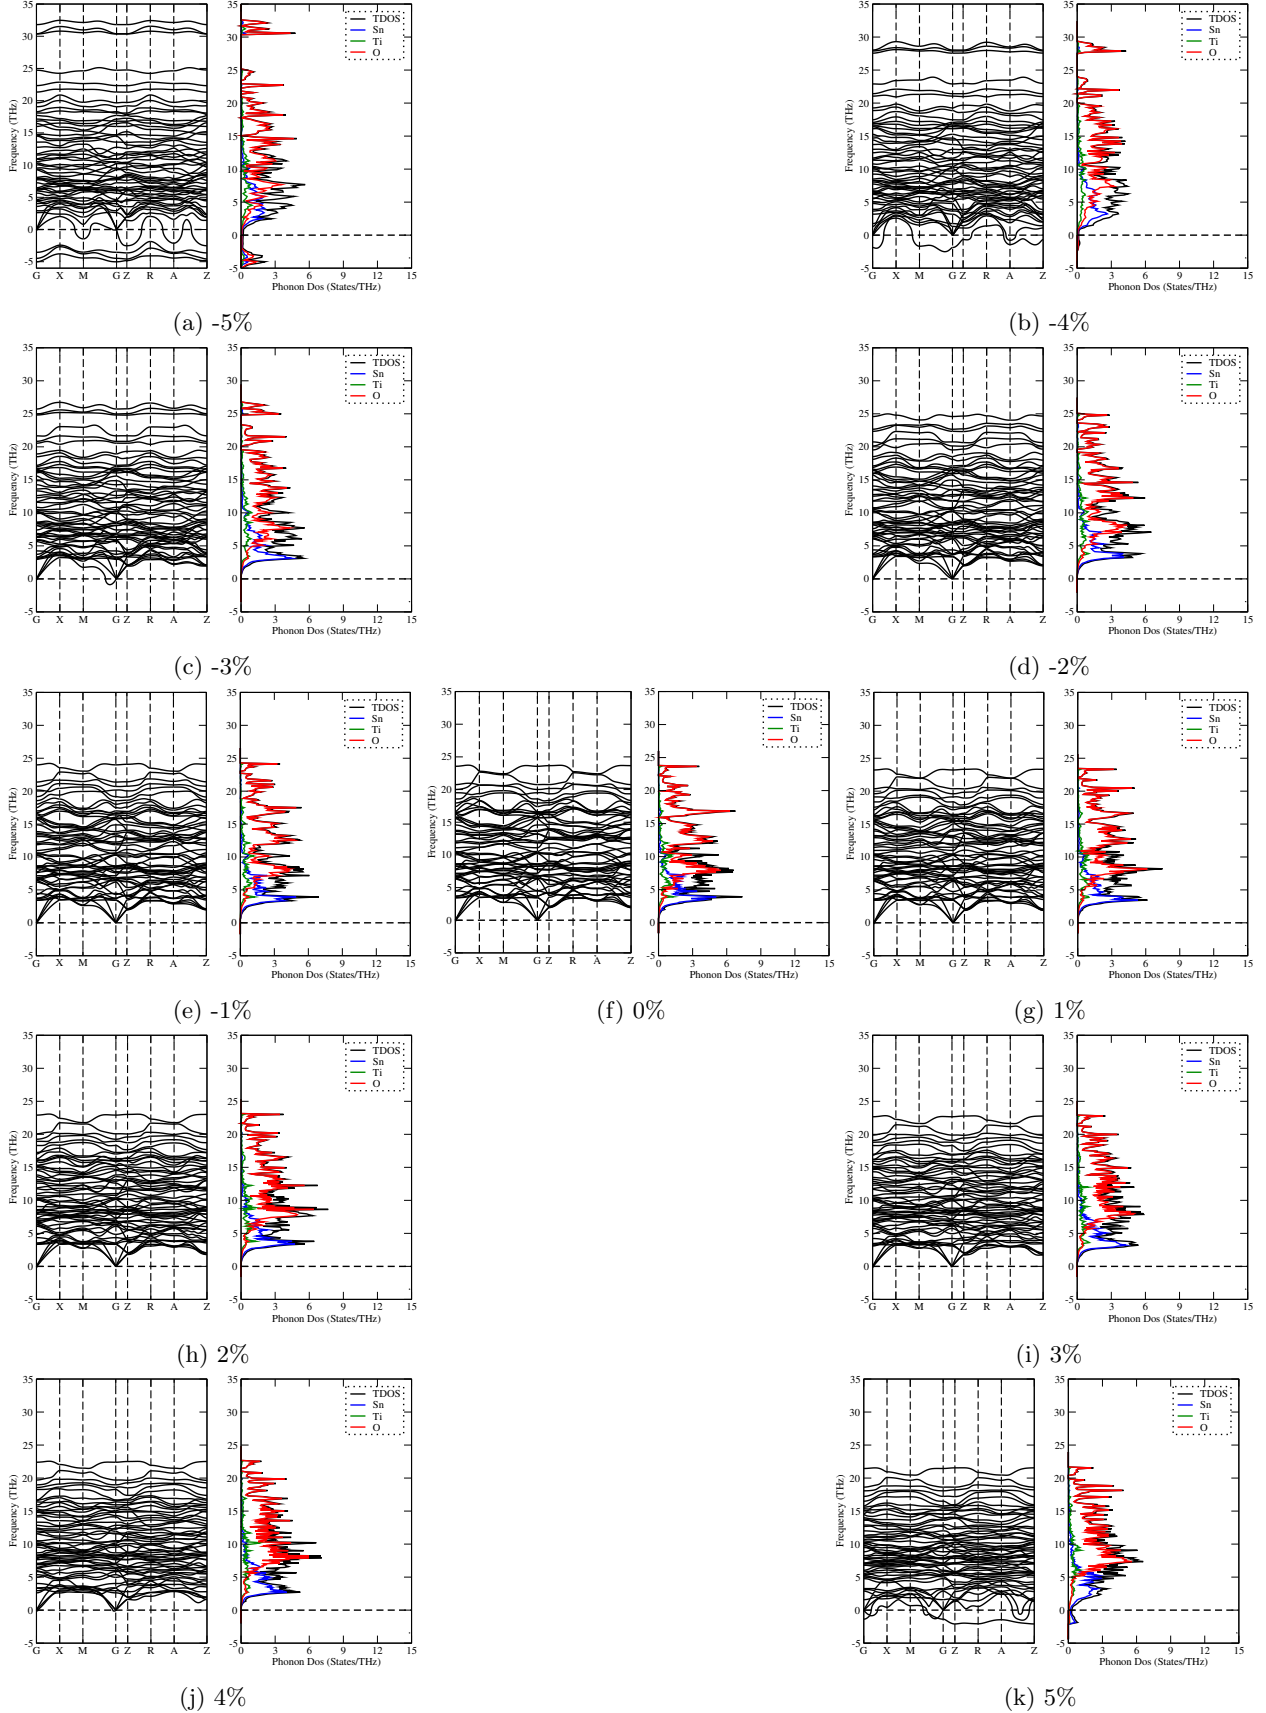

Figure S10: (a-k) Phonon dispersion curves and phonon densities of states of unstrained and strained 2SO/1TO superlattice under different biaxial compressive (-5%, -4%, -3%, -2%, and -1%) and tensile (1%, 2%, 3%, 4%, and 5%) strains.



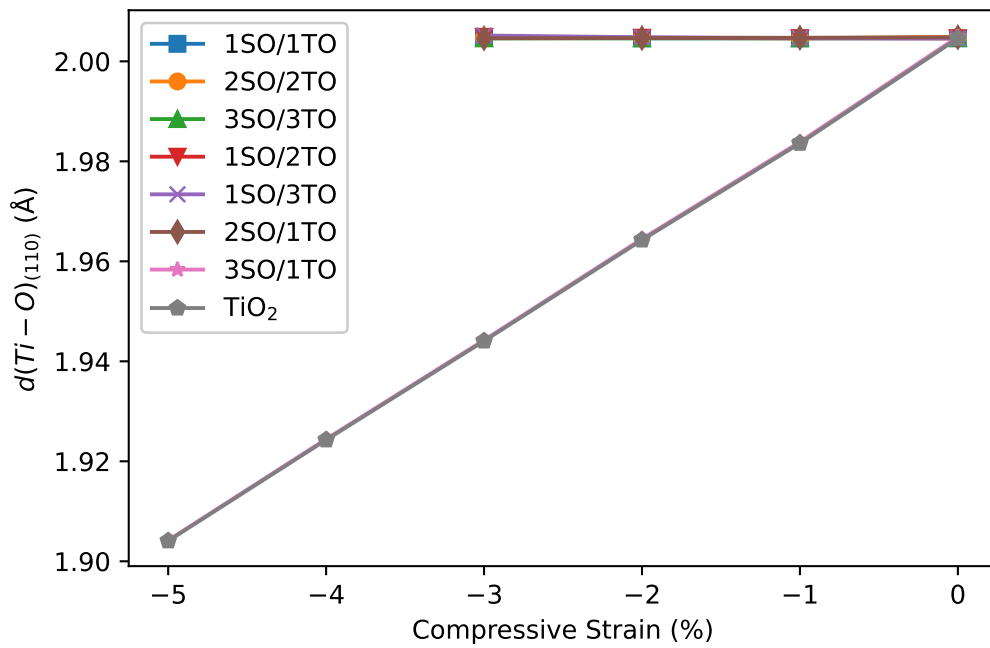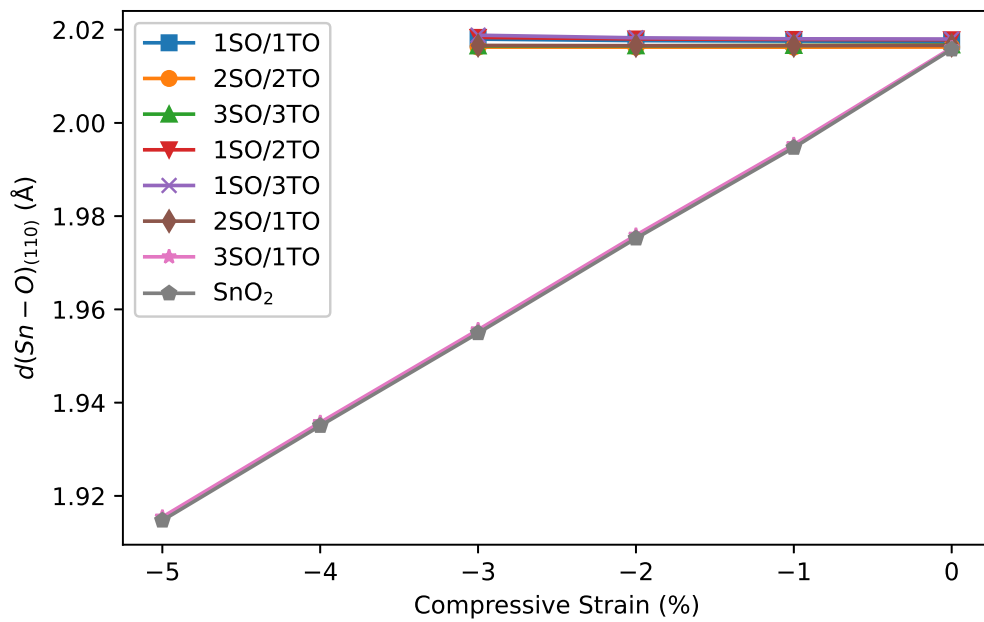

Figure S11: Bond lengths  $d(\text{Ti}-\text{O})$  (upper part) and  $d(\text{Sn}-\text{O})$  (bottom part) along (110) plane of nSO/mTO superlattices as a function of compressive strains.

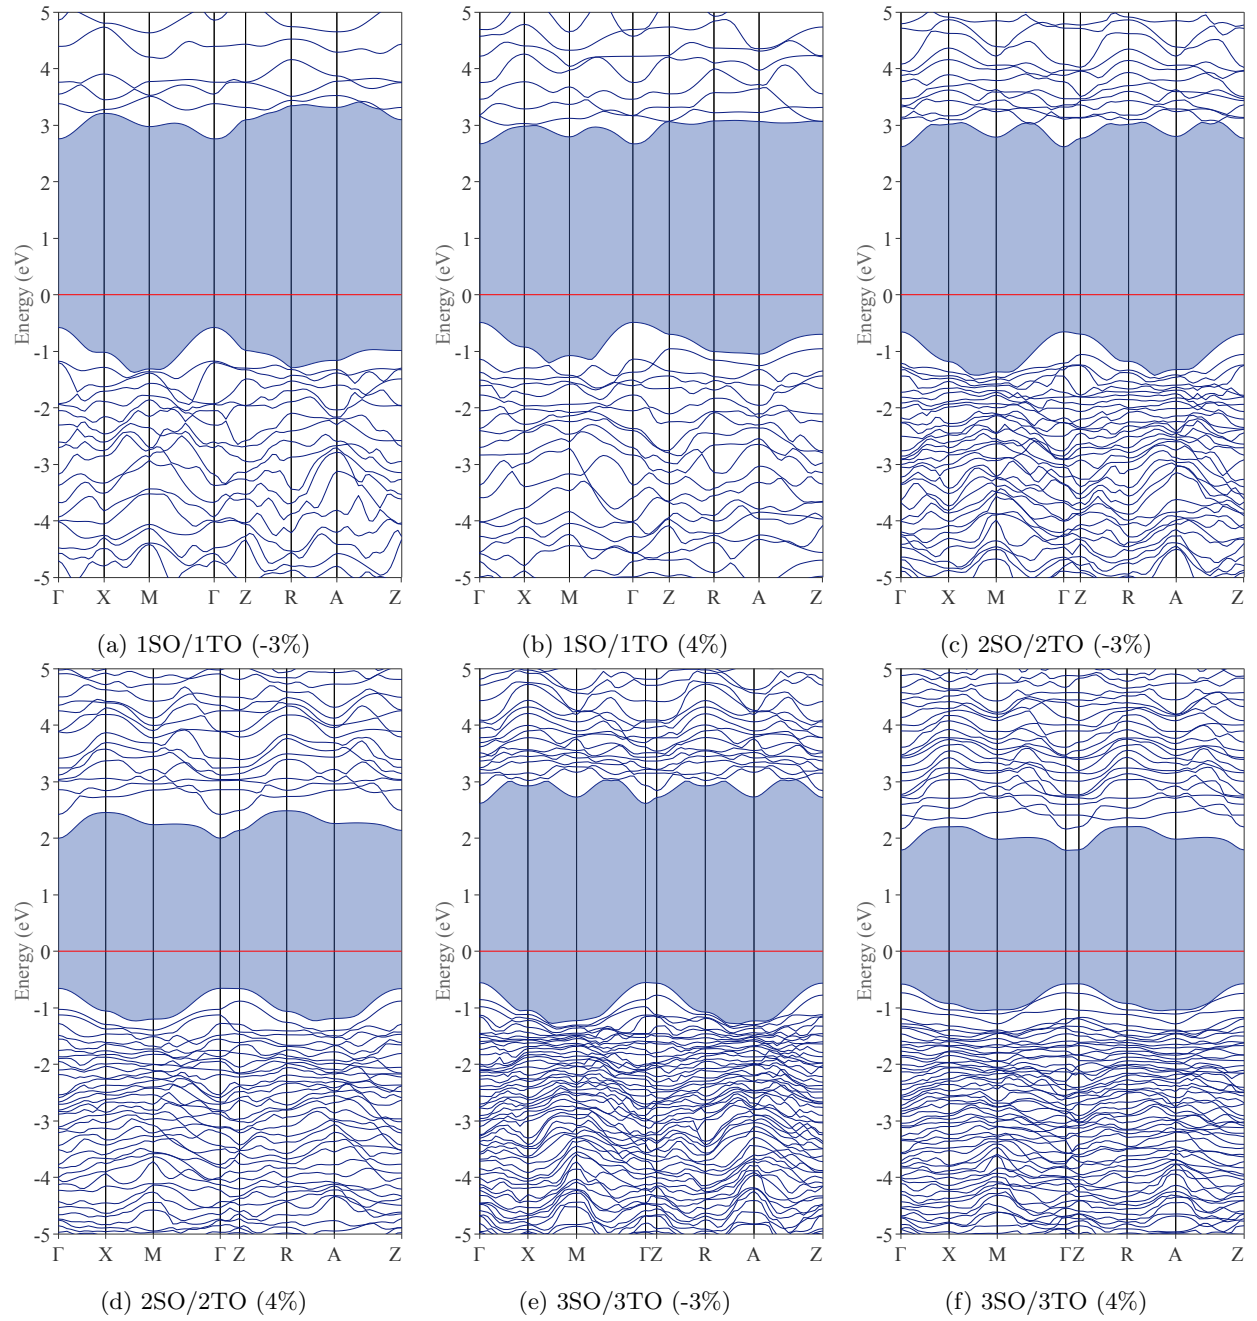

Figure S12: (a-f) Band structures of  $n$ SO/ $m$ TO superlattices with ( $n=m$ ) stacking periodicity at the upper limits of compressive and tensile strain.

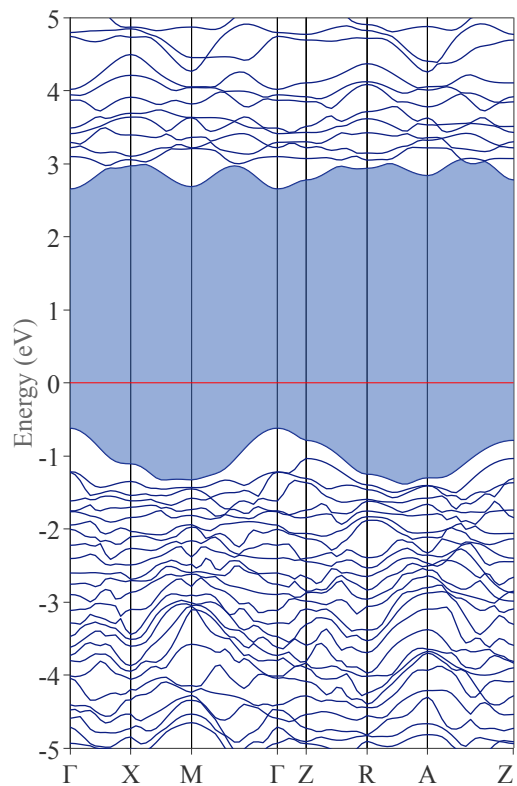

(a) 1SO/2TO (-3%)

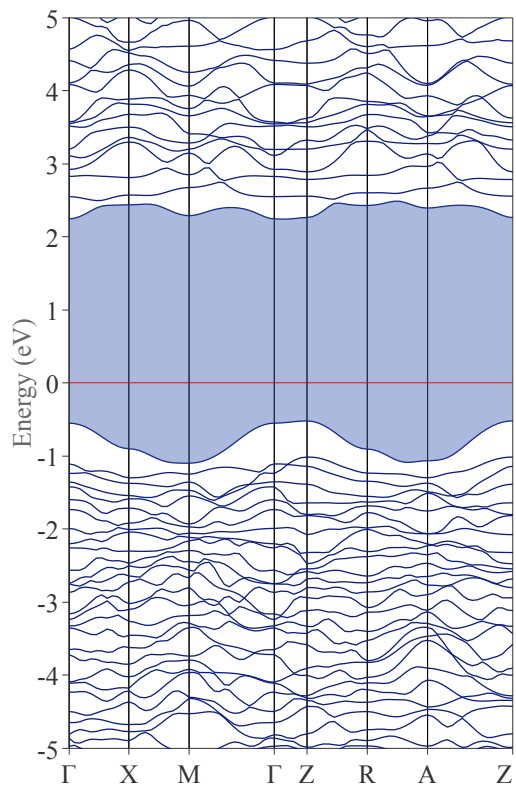

(b) 1SO/2TO (4%)

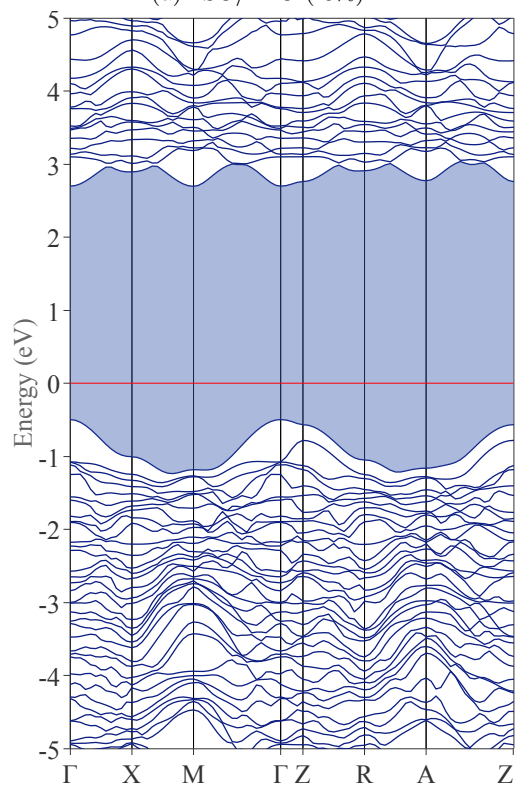

(c) 1SO/3TO (-3%)

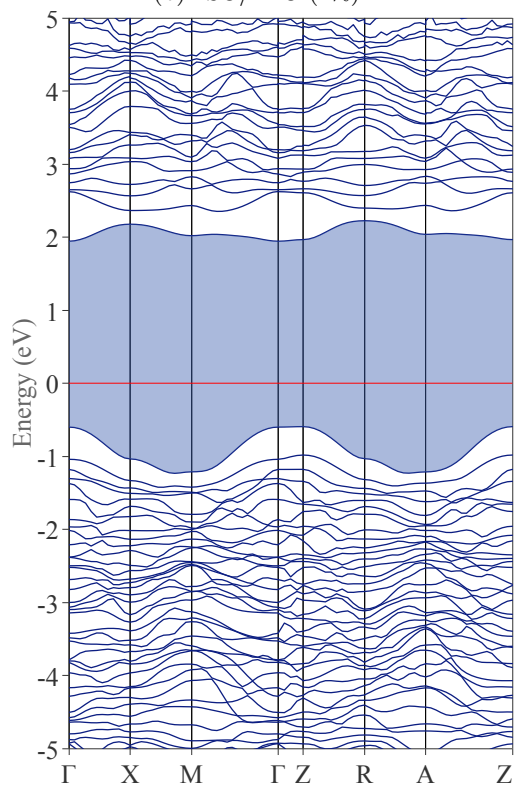

(d) 1SO/3TO (4%)

Figure S13: (a-d) Band structures of nSO/mTO superlattices with (1, m) stacking periodicity at the upper limits of compressive and tensile strain.

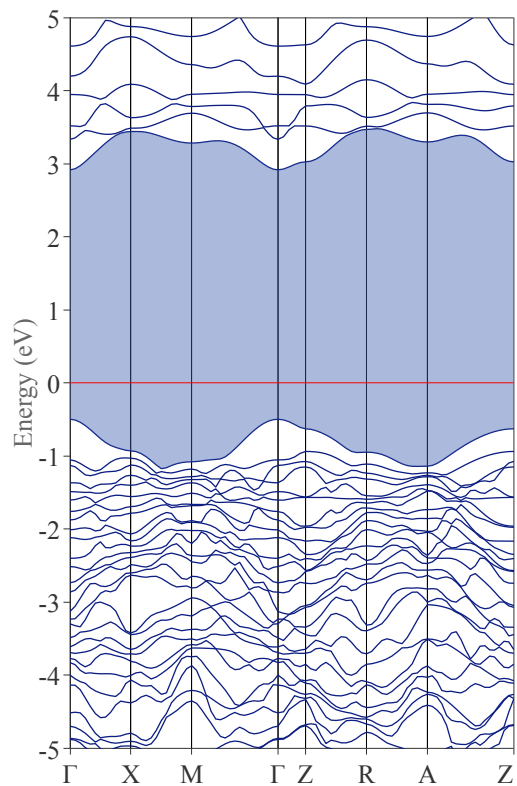

(a) 2SO/1TO (-3%)

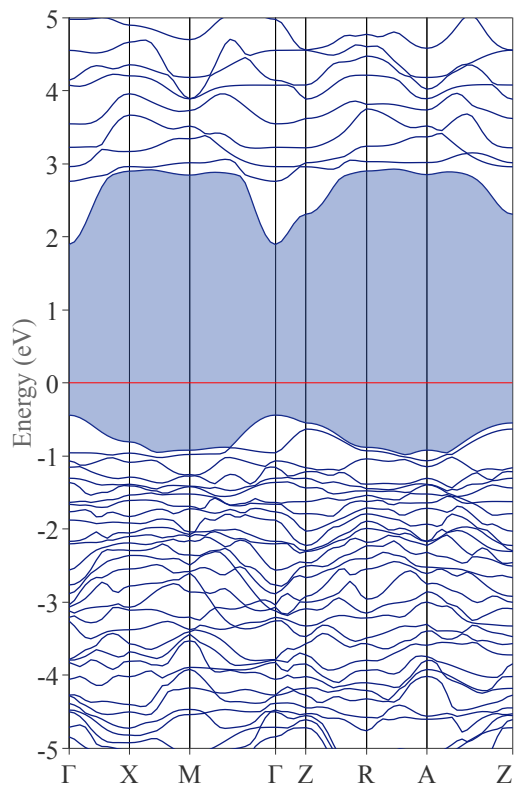

(b) 2SO/1TO (4%)

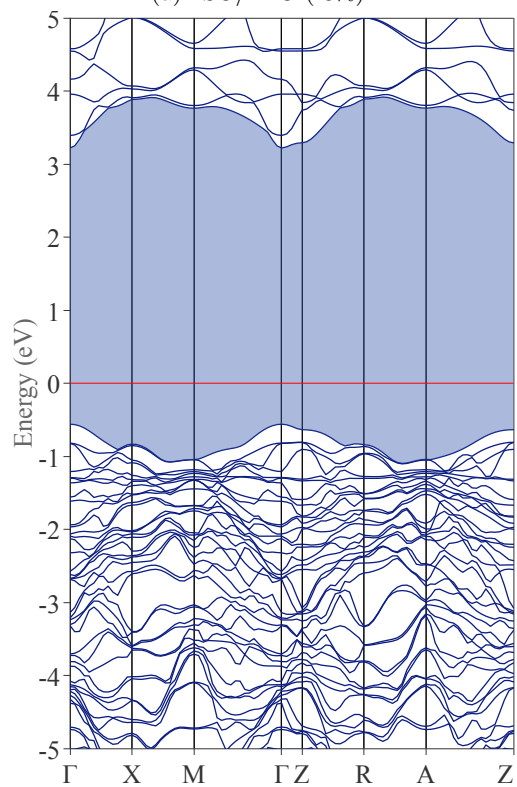

(c) 3SO/1TO (-5%)

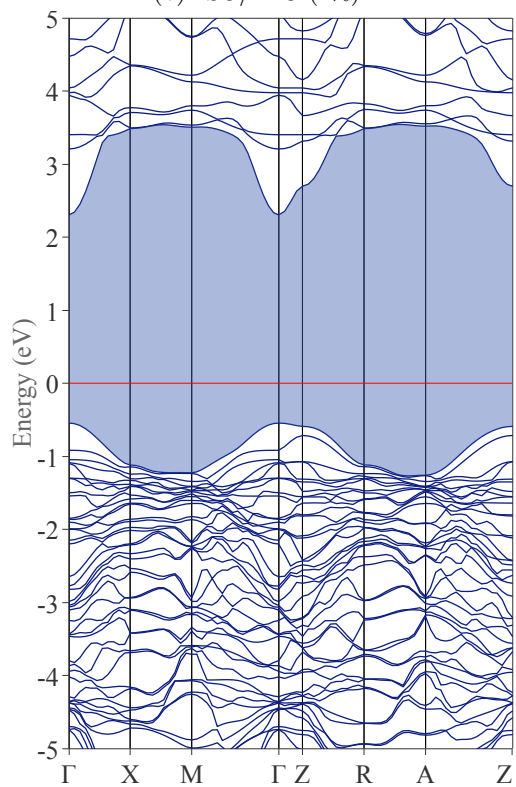

(d) 3SO/1TO (5%)

Figure S14: (a-d) Band structures of nSO/mTO superlattices with (n, 1) stacking periodicity at the upper limits of compressive and tensile strain.

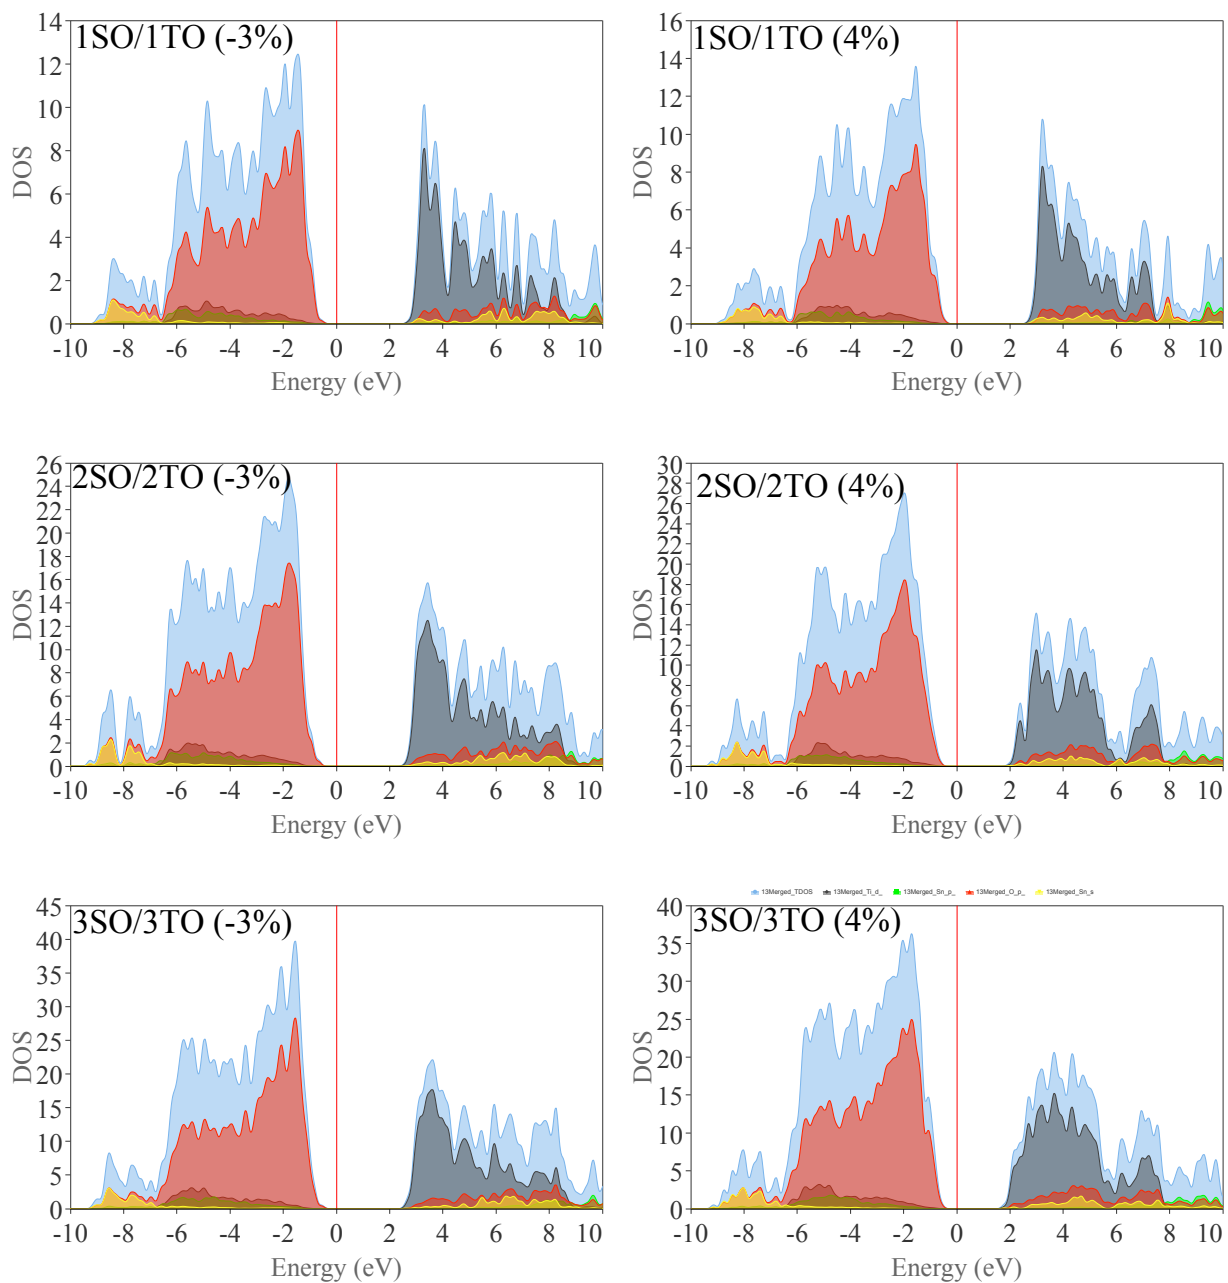

Figure 15: Total and Projected Density of states of  $n$ SO/ $m$ TO superlattices with  $(n = m)$  stacking periodicity at the upper limits of compressive and tensile strain. The Fermi level is located at zero (0 eV).

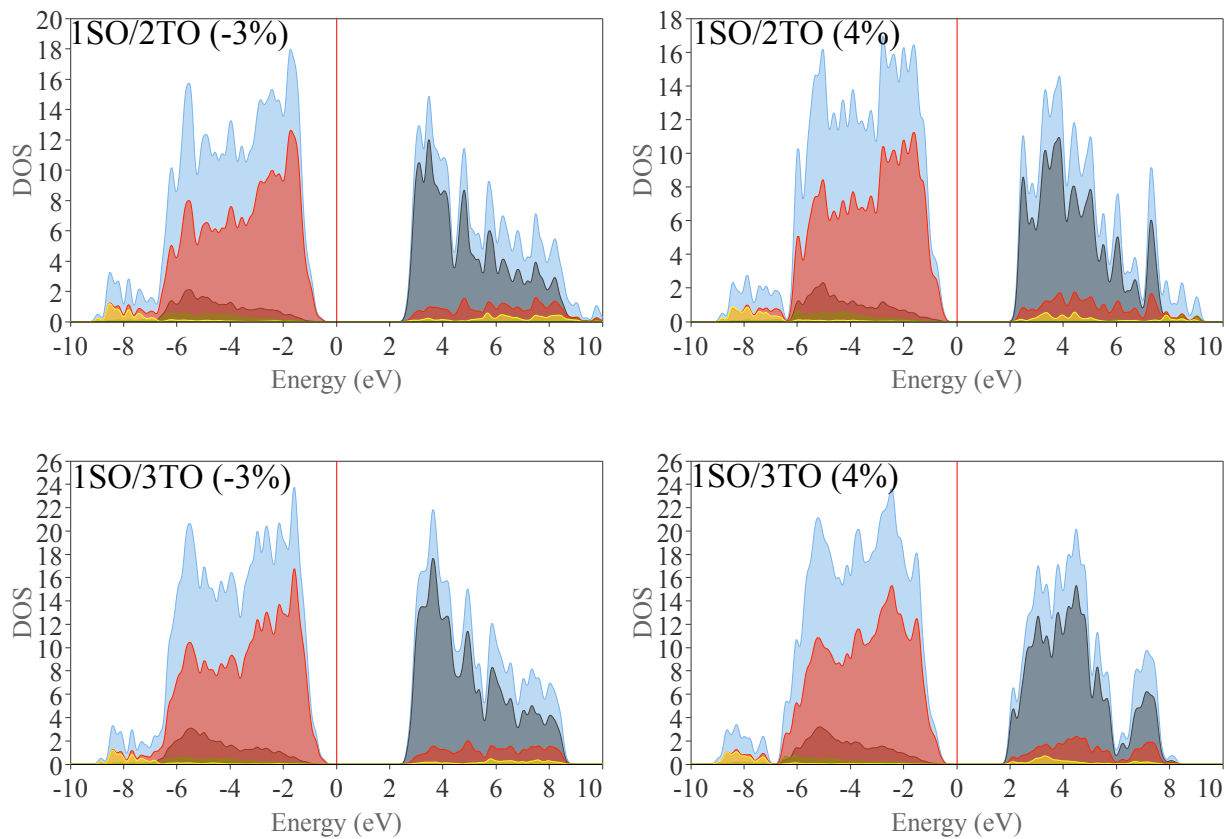

Figure 16: Total and Projected Density of states of nSO/mTO superlattices with (1, m) stacking periodicity at the upper limits of compressive and tensile strain. The Fermi level is located at zero (0 eV).

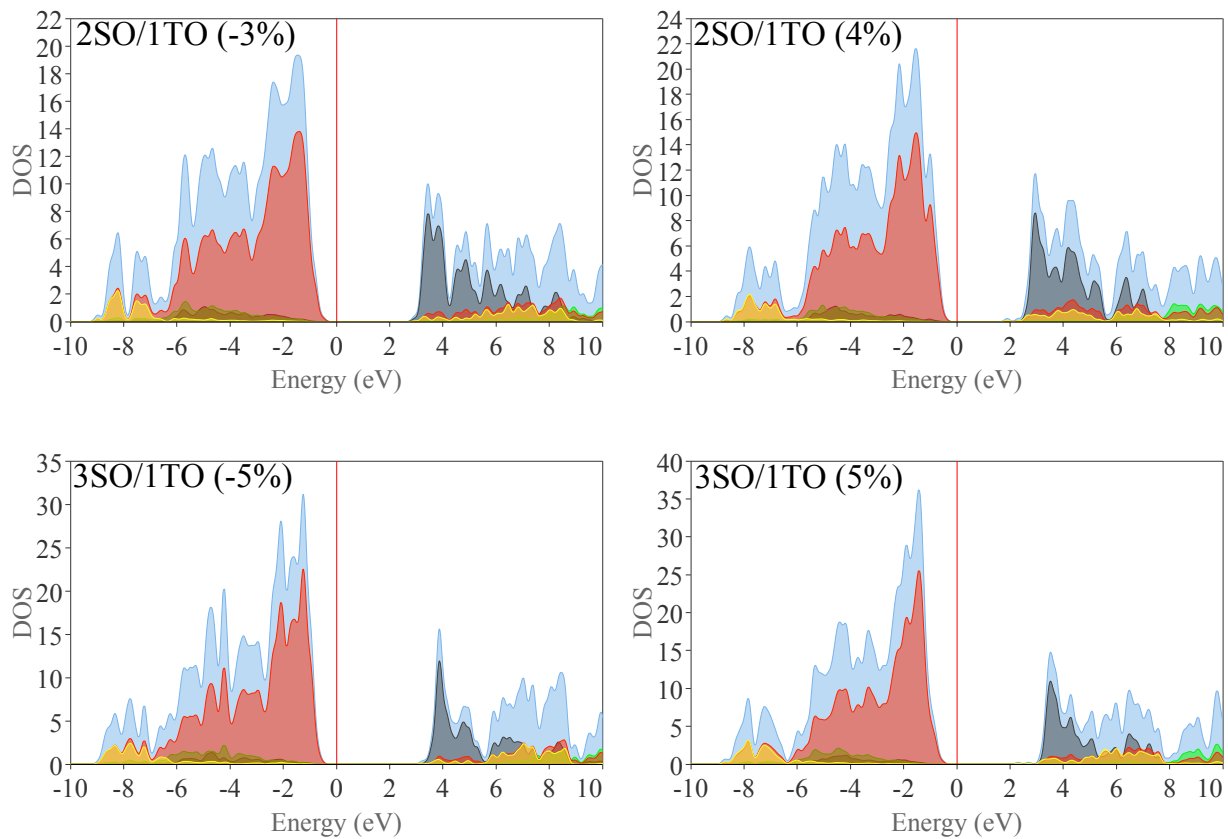

Figure 17: Total and Projected Density of states of  $n$ SO/ $m$ TO superlattices with  $(n, 1)$  stacking periodicity at the upper limits of compressive and tensile strain. The Fermi level is located at zero (0 eV).

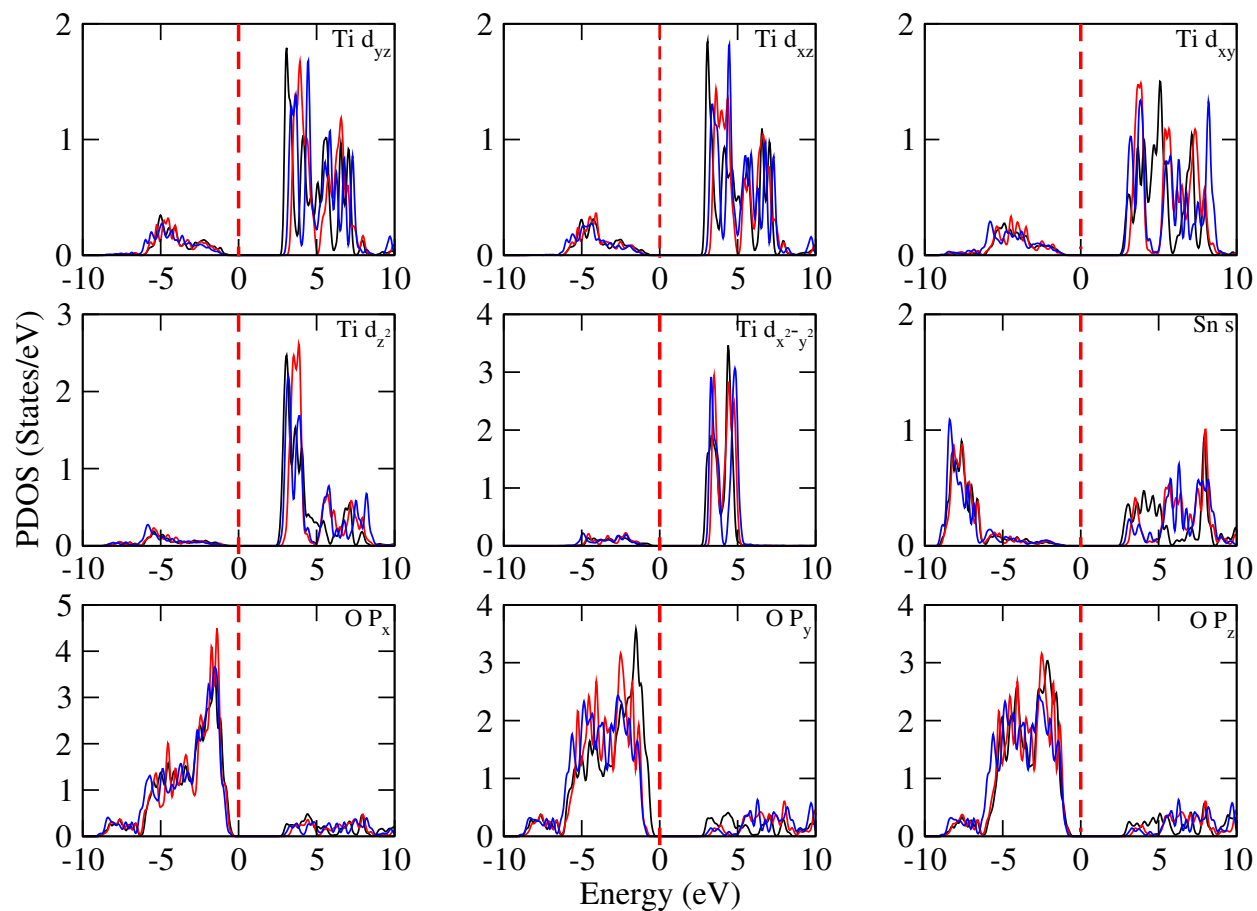

Figure S18: Ti-d, Sn-s and O-P orbital projected density of states of 1SO/1TO superlattices under upper limits -3% (black), 0% (red) and 4% (blue) biaxial strains.



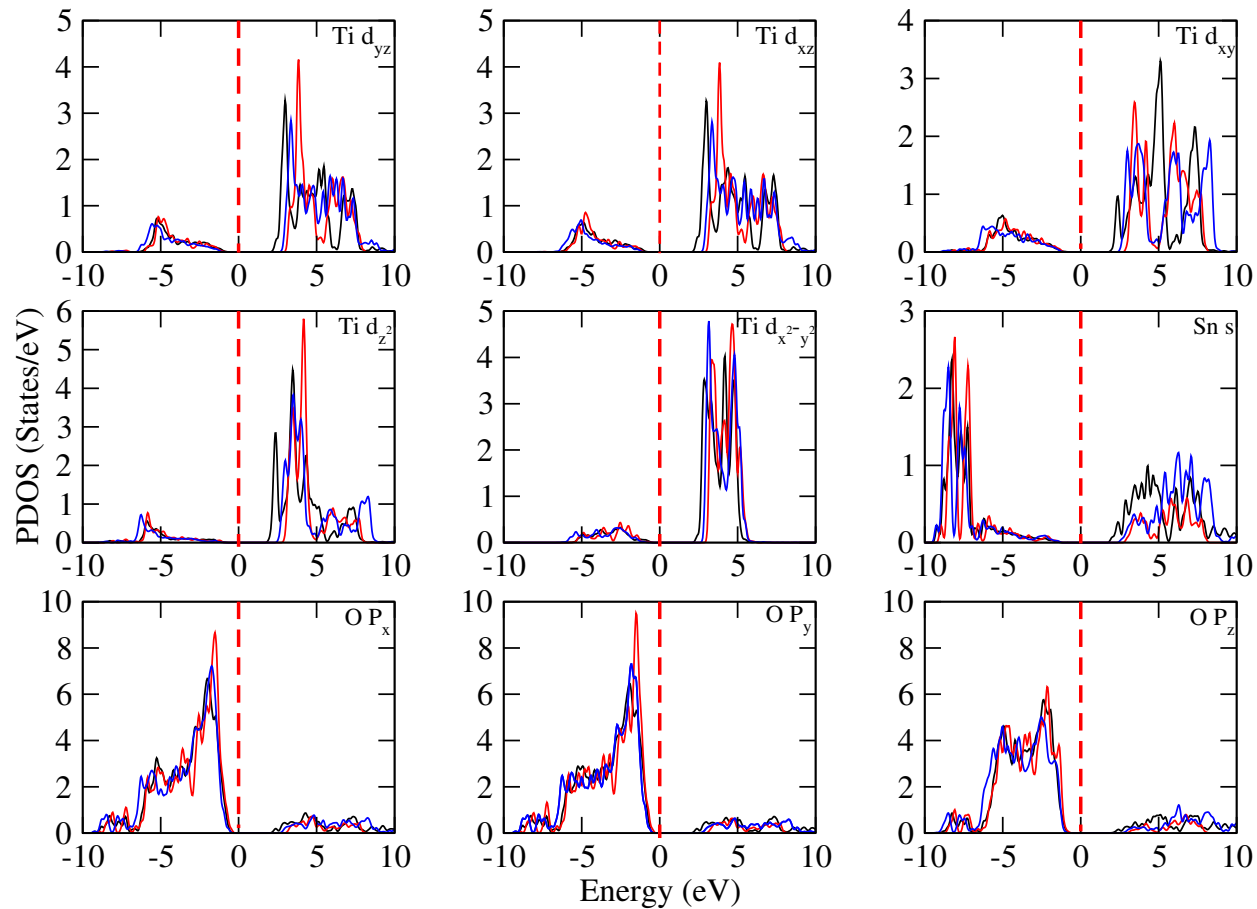

Figure S19: Ti-d, Sn-s and O-P orbital projected density of states of 2SO/2TO superlattices under upper limits 4% (black), 0% (red) and -3% (blue) biaxial strains.

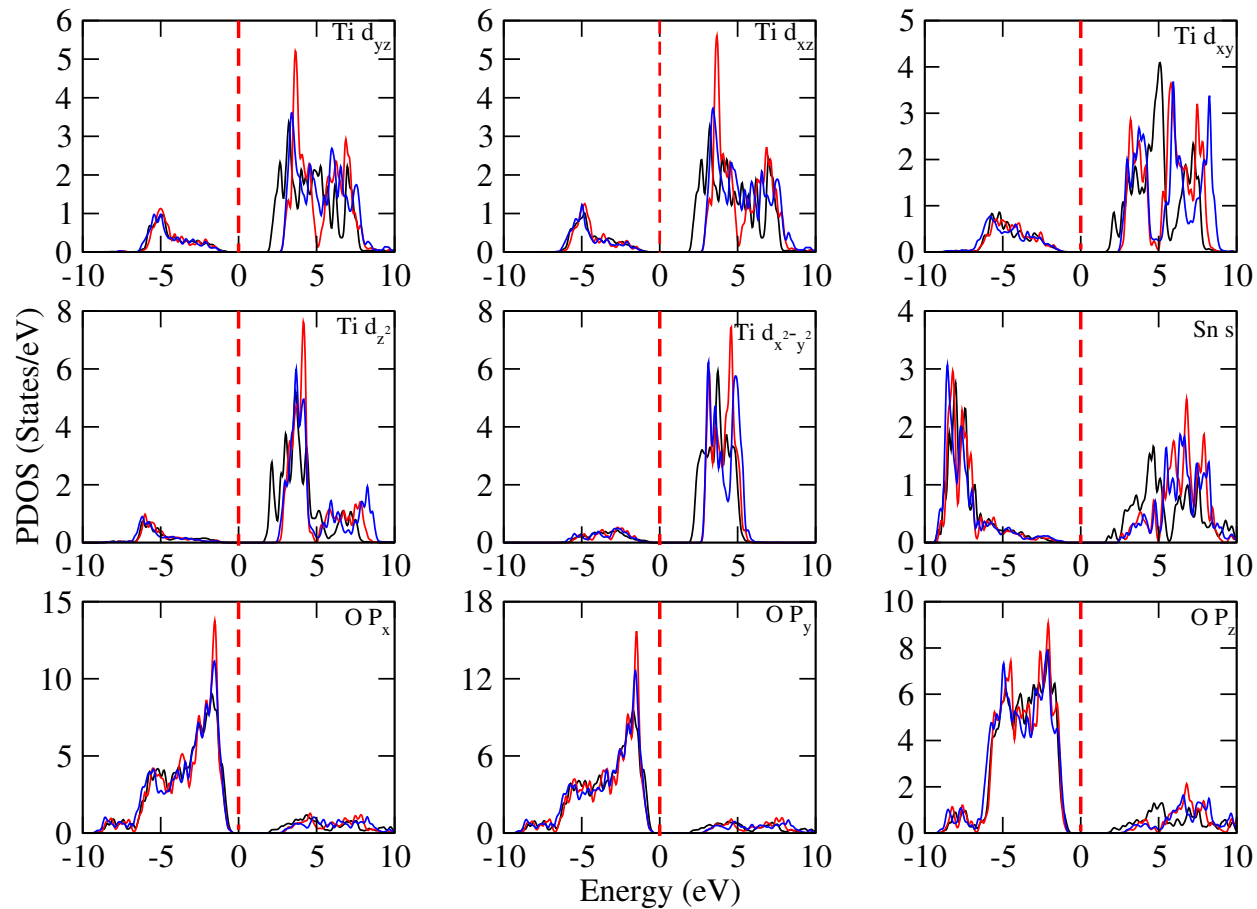

Figure S20: Ti-d, Sn-s and O-P orbital projected density of states of 3SO/3TO superlattices under upper limits 4% (black), 0% (red) and -3% (blue) biaxial strains

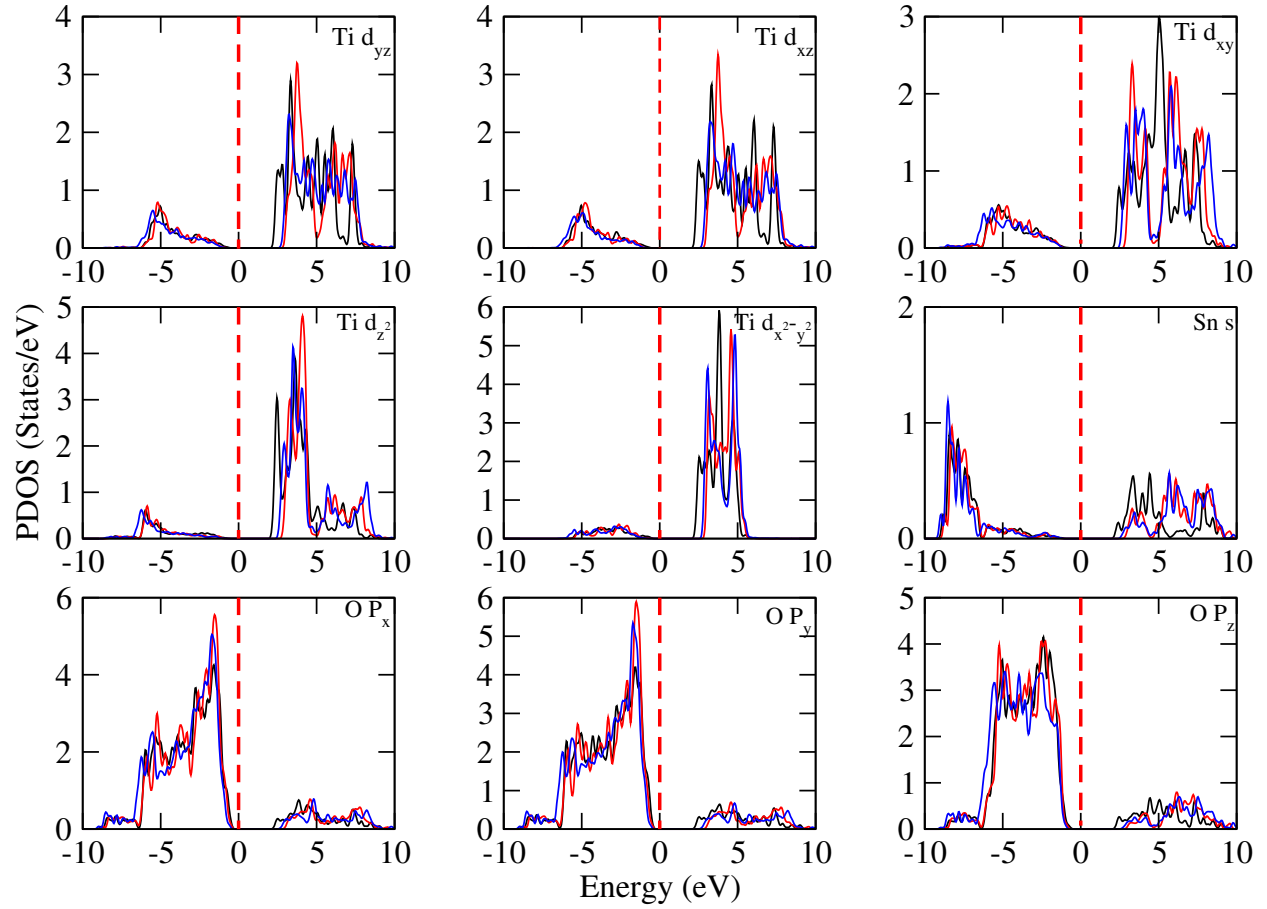

Figure S21: Ti-d, Sn-s and O-P orbital projected density of states of ISO/2TO superlattices under upper limits -3% (black), 0% (red) and 4% (blue) biaxial strains.

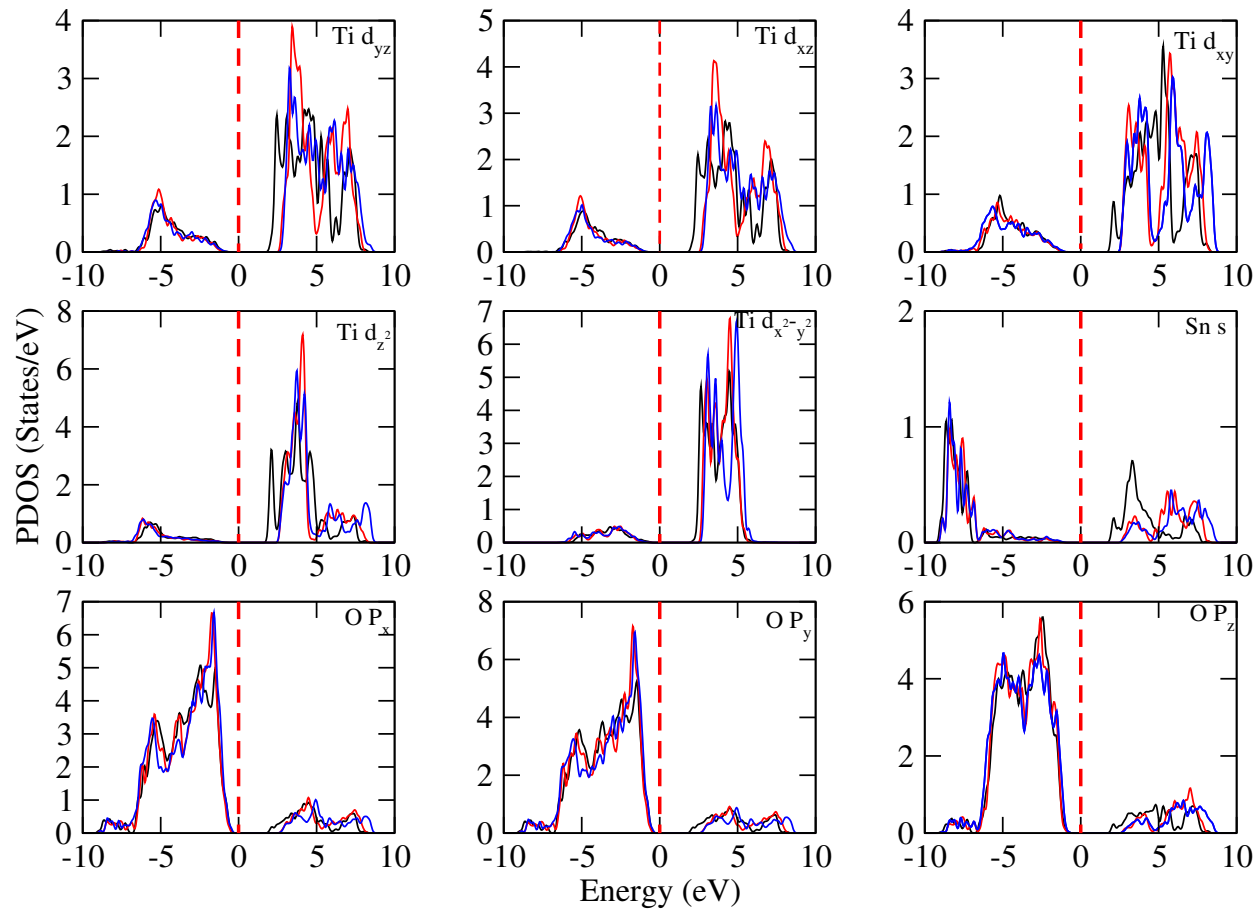

Figure S22: Ti-d, Sn-s and O-P orbital projected density of states of ISO/3TO superlattices under upper limits -3% (black), 0% (red) and 4% (blue) biaxial strains.

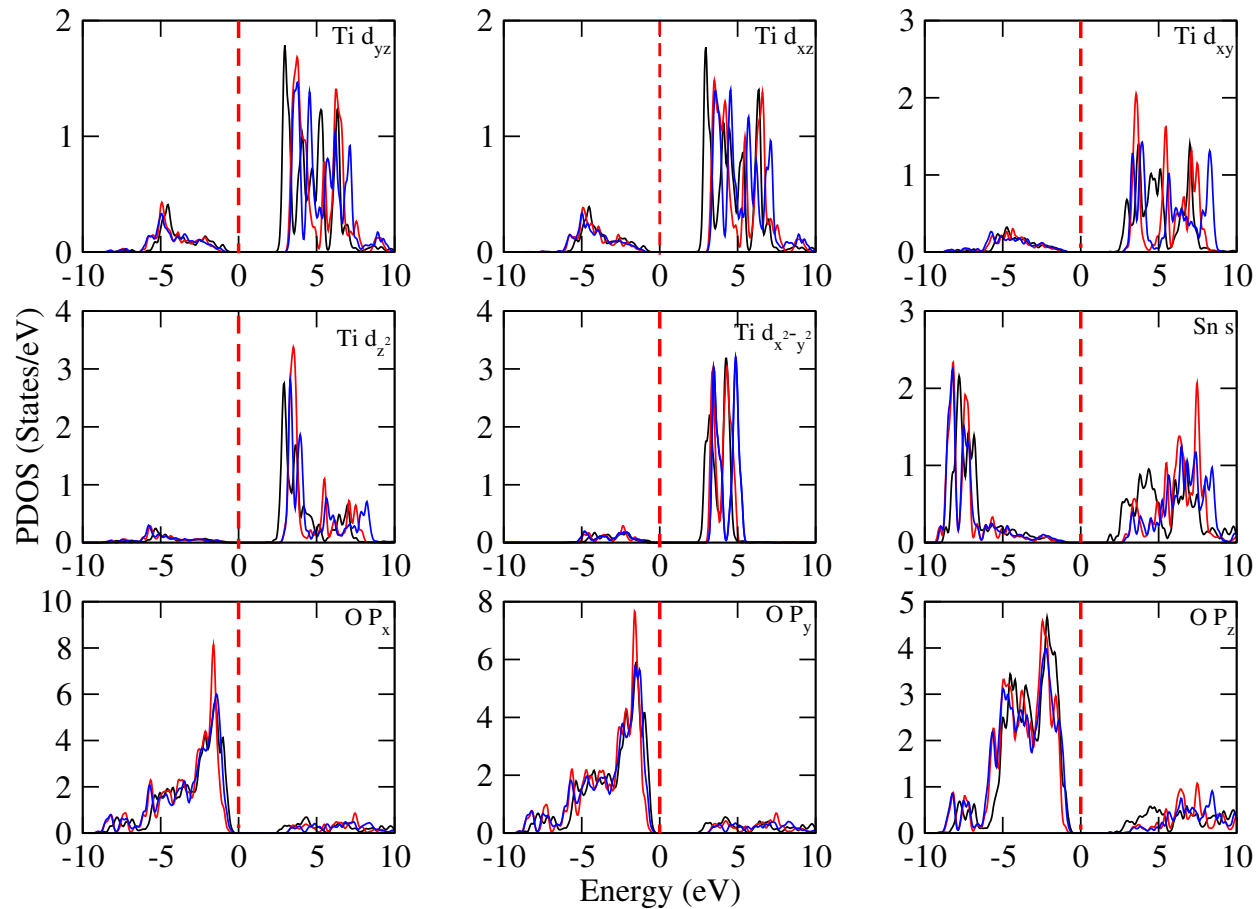

Figure S23: Ti-d, Sn-s and O-P orbital projected density of states of 2SO/1TO superlattices under upper limits -3% (black), 0% (red) and 4% (blue) biaxial strains.

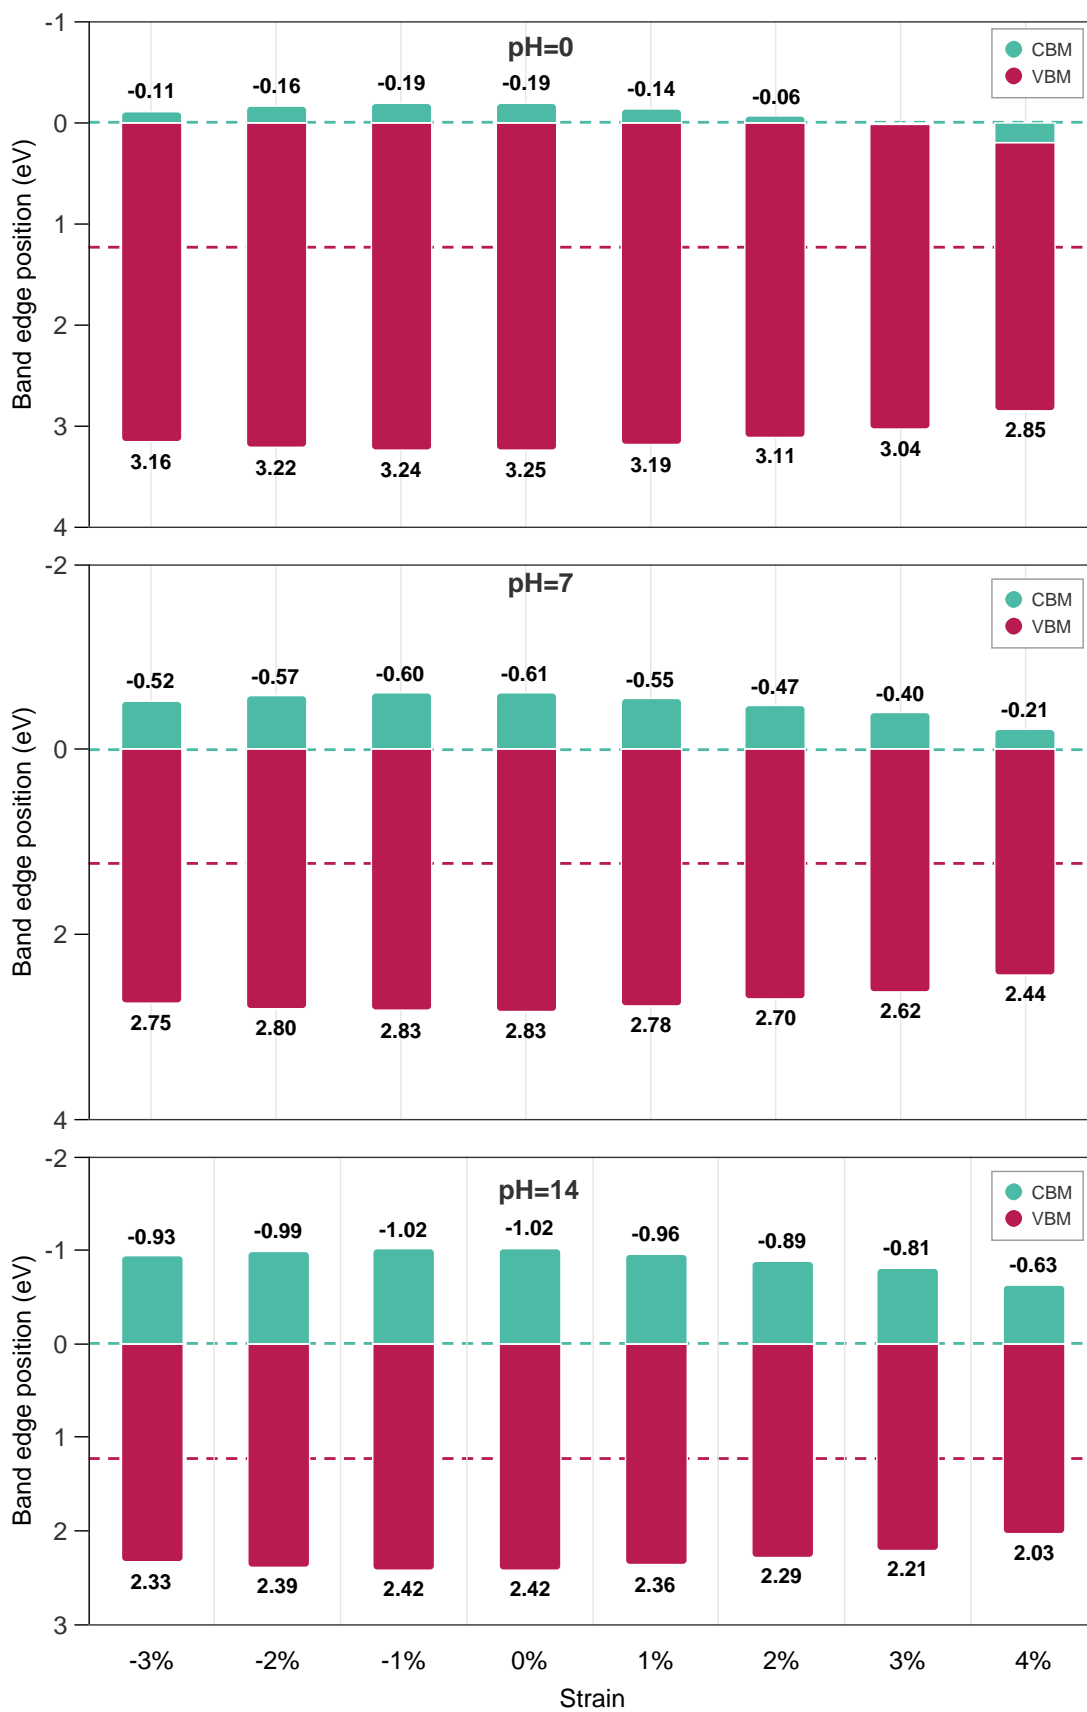

Figure S24: Energy alignment of  $(SnO_2)_2/(TiO_2)_2$  superlattice under biaxial tensile and compressive strain when pH = 0 (upper part), 7 (middle part), and 14 (bottom part). The horizontal dashed lines are water redox potentials.

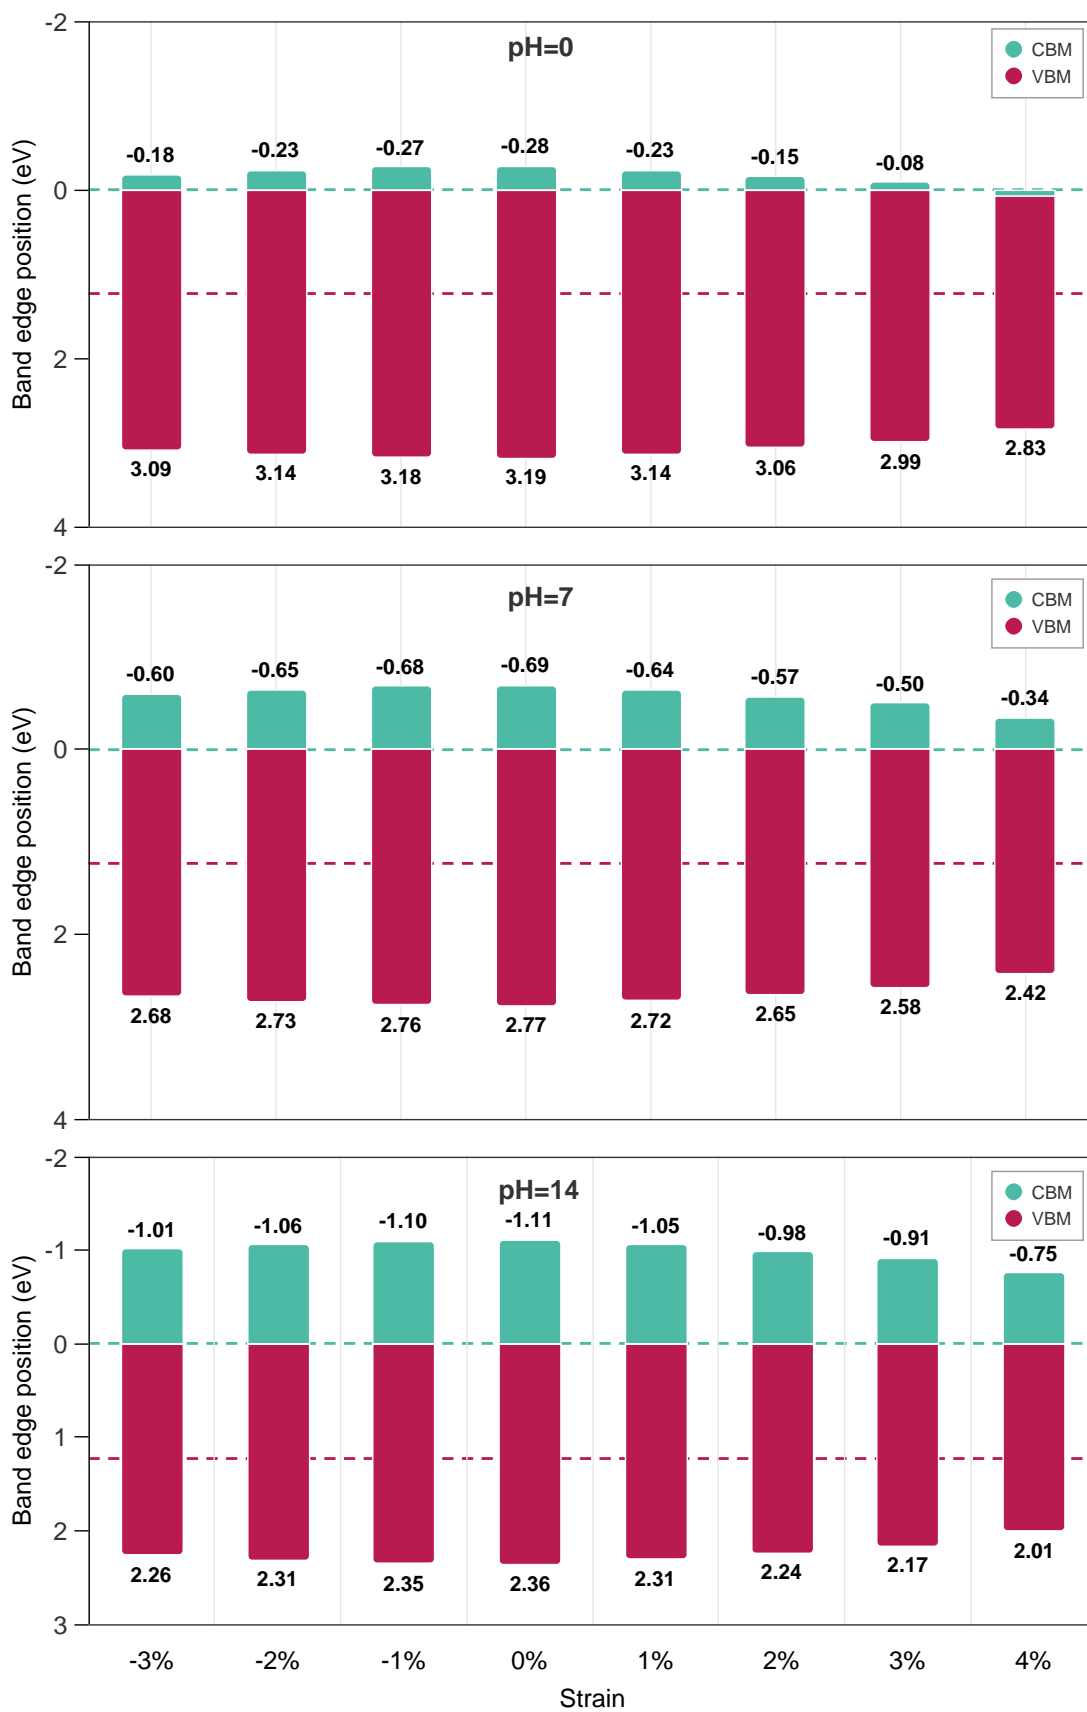

Figure S25: Energy alignment of  $(SnO_2)_1/(TiO_2)_2$  superlattice under biaxial tensile and compressive strain when pH = 0 (upper part), 7 (middle part), and 14 (bottom part). The horizontal dashed lines are water redox potentials.

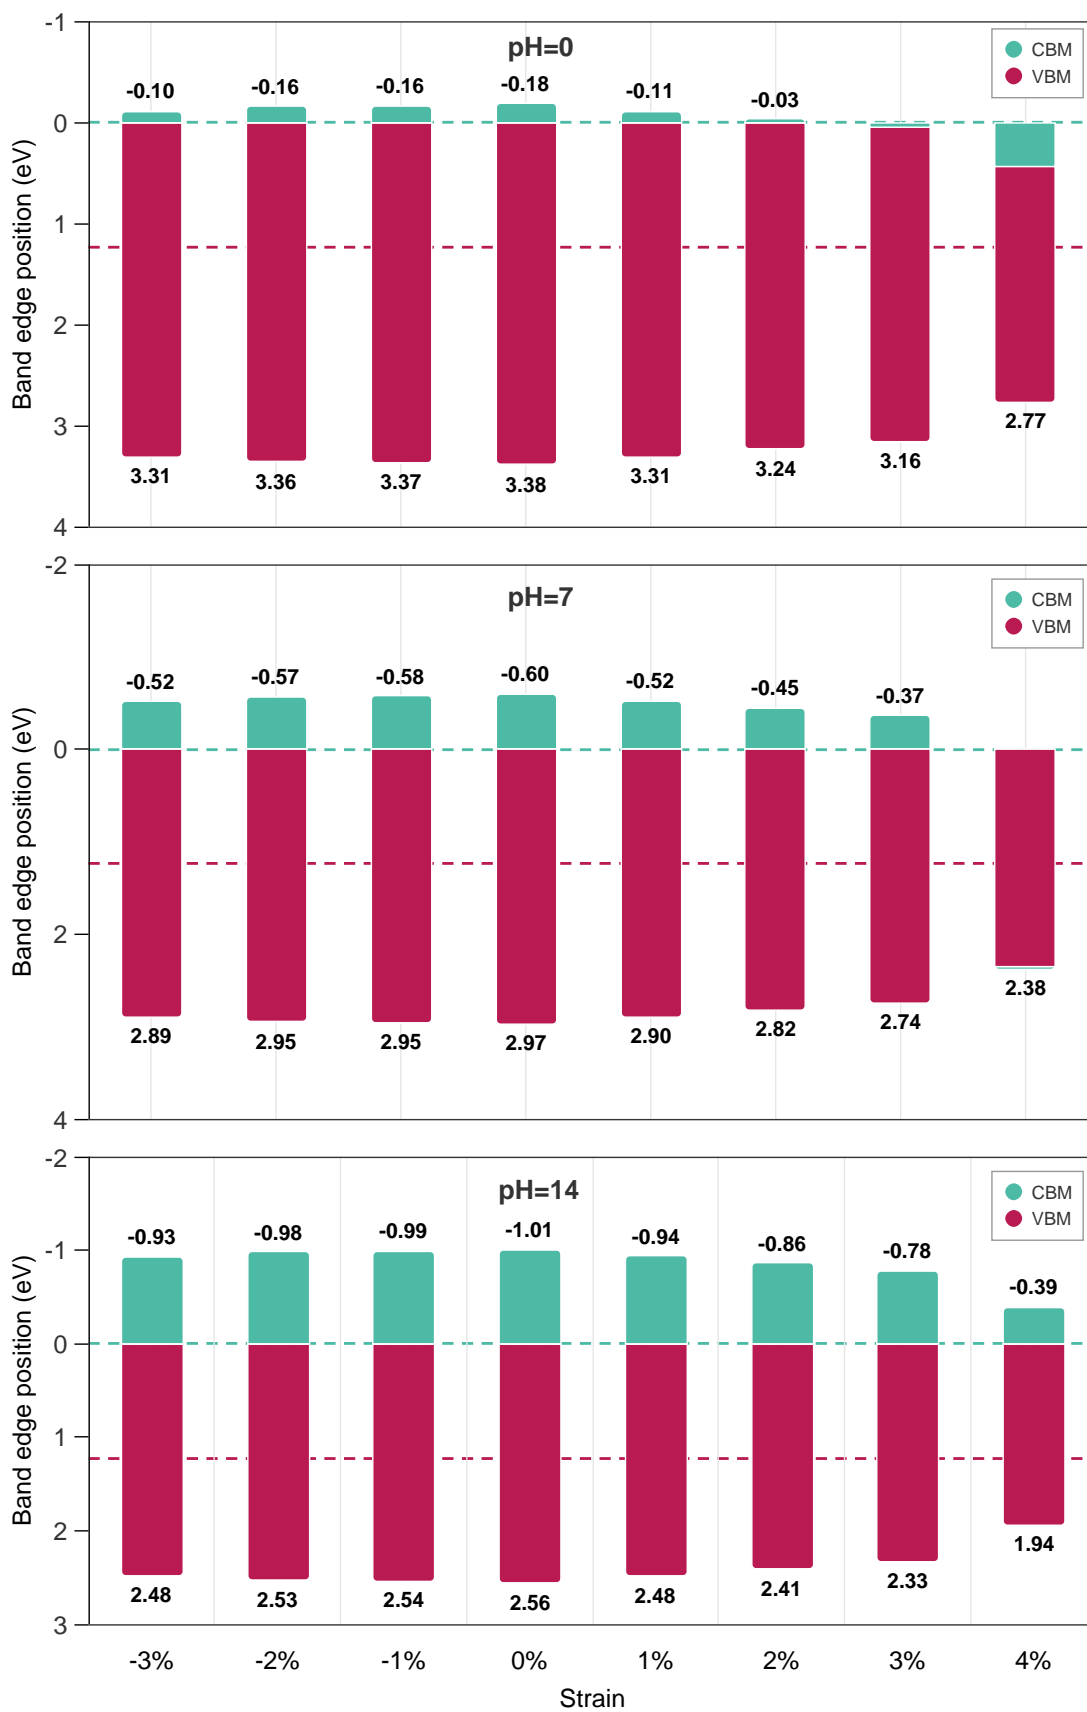

Figure S26: Energy alignment of  $(\text{SnO}_2)_2/(\text{TiO}_2)_1$  superlattice under biaxial tensile and compressive strain when pH = 0 (upper part), 7 (middle part), and 14 (bottom part). The horizontal dashed lines are water redox potentials.



## References

- [1] Bo Thangaraju. Structural and electrical studies on highly conducting spray deposited fluorine and antimony doped  $\text{SnO}_2$  thin films from  $\text{SnCl}_2$  precursor. *Thin solid films*, 402(1-2):71–78, 2002.
- [2] SC Abrahams and JL Bernstein. Rutile: normal probability plot analysis and accurate measurement of crystal structure. *The Journal of Chemical Physics*, 55(7):3206–3211, 1971.
